# Supplementary material for: Prevalence and progression of rheumatic heart disease: a global systematic review and meta-analysis of population-based echocardiographic studies
Source: PubMed Central journal article supplement (PMC6863880; doi:10.1038/s41598-019-53540-4), 2019-11-19

## SUPPLEMENTARY MATERIAL

### **Prevalence and progression of rheumatic heart disease: a global systematic review and meta-analysis of population-based echocardiographic studies**

Jean Jacques Noubiap, Valirie N. Agbor, Jean Joel Bigna, Arnaud D. Kaze, Ulrich Flore  
Nyaga, Bongani M. Mayosi

#### **Contents**

|                                                                                                                                              |    |
|----------------------------------------------------------------------------------------------------------------------------------------------|----|
| Supplementary Table 1. Search strategy on PubMed.....                                                                                        | 2  |
| Supplementary Table 2. Search strategy on EMBASE .....                                                                                       | 2  |
| Supplementary Table 3. Search strategy on Web of Science .....                                                                               | 2  |
| Supplementary Table 4. Search strategy on Global Index Medicus.....                                                                          | 3  |
| Supplementary Table 5. Search strategy on Cochrane Library .....                                                                             | 3  |
| Supplementary Table 6. Characteristics of included prevalence studies.....                                                                   | 4  |
| Supplementary Table 7. Individual characteristics of included studies reporting on the prevalence of rheumatic heart disease .....           | 5  |
| Supplementary Table 8. Individual characteristics of included studies reporting on the evolution of clinically rheumatic heart disease ..... | 9  |
| Supplementary Table 9. Summary statistics from meta-analyses of prevalence studies on rheumatic heart disease, by subgroup.....              | 10 |
| Supplementary Figure 1. Funnel plot for publication bias for studies using the WHO diagnostic criteria.....                                  | 13 |
| Supplementary Figure 2. Funnel plot for publication bias for studies using the WHF diagnostic criteria.....                                  | 14 |
| Supplementary Figure 3. Funnel plot for publication bias for studies using diagnostic criteria other than WHF and WHO.....                   | 15 |
| Supplementary Figure 4. Funnel plot for publication bias for studies using an auscultation-echocardiographic screening protocol.....         | 16 |
| Supplementary Figure 5. Funnel plot for publication bias for studies using an echocardiography-echocardiography screening protocol.....      | 17 |
| Supplementary Figure 6. Funnel plot for publication bias for studies using only one step echocardiography screening protocol.....            | 18 |

**Supplementary Table 1. Search strategy on PubMed**

|    | Search terms                                                                                                                                                                                                                                                                                                                                                                                                                                                                                                                                                                                                                                                                                                                                        | Items found |
|----|-----------------------------------------------------------------------------------------------------------------------------------------------------------------------------------------------------------------------------------------------------------------------------------------------------------------------------------------------------------------------------------------------------------------------------------------------------------------------------------------------------------------------------------------------------------------------------------------------------------------------------------------------------------------------------------------------------------------------------------------------------|-------------|
| #1 | ("Rheumatic Fever"[Mesh] OR "Rheumatic Heart Disease"[Mesh] OR "Disease, Rheumatic Heart"[Mesh] OR "Diseases, Rheumatic Heart"[Mesh] OR "Heart Disease, Rheumatic"[Mesh] OR "Heart Diseases, Rheumatic"[Mesh] OR "Rheumatic Heart Diseases"[Mesh] OR "Bouillaud Disease"[Mesh] OR "Disease, Bouillaud"[Mesh] OR "Bouillaud's Disease"[Mesh] OR "Bouillauds Disease"[Mesh] OR "Disease, Bouillaud's"[Mesh] OR "Fever, Rheumatic"[Mesh] OR "Fevers, Rheumatic"[Mesh] OR "Rheumatic Fevers"[Mesh] OR "Rheumatic Fever, Acute"[Mesh] OR Rheumatic Fever[tiab] OR Rheumatic Heart Disease[tiab] OR Rheumatic Heart[tiab] OR Rheumatic Heart[tiab] OR Rheumatic[tiab] OR Bouillaud[tiab] OR rheumatic valvular heart disease[tiab] OR "RHD" OR RHD[tiab]) | 57,953      |
| #2 | ("Echocardiography"[Mesh] OR Echocardiography[tiab] OR echocardio* OR "cardiac ultrasound" OR "cardiac echo*" OR "cardiac echography")                                                                                                                                                                                                                                                                                                                                                                                                                                                                                                                                                                                                              | 174,373     |
| #3 | #1 AND #2                                                                                                                                                                                                                                                                                                                                                                                                                                                                                                                                                                                                                                                                                                                                           | 2,884       |

**Supplementary Table 2. Search strategy on EMBASE**

|    |                                                                                                                                                                                                                                                                                                                                                                              |         |
|----|------------------------------------------------------------------------------------------------------------------------------------------------------------------------------------------------------------------------------------------------------------------------------------------------------------------------------------------------------------------------------|---------|
| #1 | ('rheumatic heart disease'/exp OR 'rheumatic fever'/exp OR 'rheumatic heart disease':ab,ti OR 'rheumatic cardiac':ab,ti OR 'rheumatic heart':ab,ti OR 'rheumatic fever':ab,ti OR 'rheumatic valve':ab,ti OR 'rheumatic valvular':ab,ti OR Bouillaud:ab,ti OR Bouillauds:ab,ti OR 'rheumatic cardiac disease':ab,ti OR rhd:ab,ti OR 'rheumatic valvular heart disease':ab,ti) | 31,390  |
| #2 | ('echocardiography'/exp OR 'cardiac echography':ab,ti OR echocardiogram:ab,ti OR 'heart echography':ab,ti)                                                                                                                                                                                                                                                                   | 278,025 |
| #3 | #1 AND #2                                                                                                                                                                                                                                                                                                                                                                    | 3,324   |
| #4 | #3 AND [embase]/lim NOT [medline]/lim                                                                                                                                                                                                                                                                                                                                        | 1,169   |

**Supplementary Table 3. Search strategy on Web of Science**

|    | Search terms                                                                                                                                                                                                                                | Items found |
|----|---------------------------------------------------------------------------------------------------------------------------------------------------------------------------------------------------------------------------------------------|-------------|
| #1 | (((((((((('rheumatic heart disease' OR 'rheumatic fever') OR 'rheumatic cardiac') OR 'rheumatic valve') OR 'rheumatic valvular) OR Bouillaud) OR bouillauds) OR 'rheumatic cardiac disease') OR rhd) OR 'rheumatic valvular heart disease') | 37,399      |
| #2 | ('echocardiography' OR 'cardiac echography' OR echocardiogram OR 'heart echography')                                                                                                                                                        | 235,302     |
| #3 | #1 AND #2                                                                                                                                                                                                                                   | 3,471       |
| #4 | Medline excluded                                                                                                                                                                                                                            | 2,567       |

Web of Science includes Web of Sciences Collection, Current Contents Connect, SciELO citation Index, Russian Science Citation Index, and KCI-Korean Journal Database

**Supplementary Table 4. Search strategy on Global Index Medicus**

|    |                                                                                                                                                                                                                                                             |                  |
|----|-------------------------------------------------------------------------------------------------------------------------------------------------------------------------------------------------------------------------------------------------------------|------------------|
|    |                                                                                                                                                                                                                                                             |                  |
| #1 | tw:(('echocardiography' OR 'cardiac echography' OR echocardiogram OR 'heart echography') AND (instance:"ghl"))                                                                                                                                              | <b>1,029,812</b> |
| #2 | tw:(('rheumatic heart disease' OR 'rheumatic fever' OR 'rheumatic cardiac' OR 'rheumatic valve' OR 'rheumatic valvular' OR 'bouillaud' OR 'bouillauds' OR 'rheumatic cardiac disease' OR 'rhd' OR 'rheumatic valvular heart disease') AND (instance:"ghl")) | <b>2,700</b>     |
| #3 | <b>#1 AND #2</b>                                                                                                                                                                                                                                            | <b>370</b>       |
| #4 | <b>Medline excluded</b>                                                                                                                                                                                                                                     | <b>1</b>         |

Global Index Medicus: WPRIM (Western Pacific), LILACS (Americas), IMERMR (Eastern Mediterranean), AIM (Africa), WHOLIS (KMS), BBO – Dentistry (Brazil), IMSEAR (South-East Asia)

**Supplementary Table 5. Search strategy on Cochrane Library**

|    |                                                                                                                                                                                                                                 |              |
|----|---------------------------------------------------------------------------------------------------------------------------------------------------------------------------------------------------------------------------------|--------------|
|    |                                                                                                                                                                                                                                 |              |
| #1 | 'echocardiography' OR 'cardiac echography' OR echocardiogram OR 'heart echography'                                                                                                                                              | <b>9,136</b> |
| #2 | 'rheumatic heart disease' OR 'rheumatic fever' OR 'rheumatic cardiac' OR 'rheumatic valve' OR 'rheumatic valvular' OR 'bouillaud' OR 'bouillauds' OR 'rheumatic cardiac disease' OR 'rhd' OR 'rheumatic valvular heart disease' | <b>583</b>   |
| #3 | <b>#1 AND #2</b>                                                                                                                                                                                                                | <b>75</b>    |

**Supplementary Table 6. Characteristics of included prevalence studies**

| Characteristics             | N = 82 studies |
|-----------------------------|----------------|
| <b>Setting</b>              |                |
| - Community-based           | 14             |
| - School-based              | 64             |
| - Both                      | 2              |
| - Not reported              | 2              |
| <b>Area</b>                 |                |
| - Urban                     | 33             |
| - Rural                     | 16             |
| - Both                      | 26             |
| - Not reported              | 9              |
| <b>Sampling method</b>      |                |
| - Random                    | 80             |
| - Not reported              | 2              |
| <b>Diagnostic criteria</b>  |                |
| - WHO                       | 30             |
| - WHF                       | 32             |
| - Others                    | 22             |
| <b>Diagnostic procedure</b> |                |
| - Auscultation>Echo         | 31             |
| - Echo>Echo                 | 46             |
| - Echo>Nothing              | 5              |
| <b>Endemic area</b>         |                |
| - Yes                       | 69             |
| - No                        | 13             |
| <b>WHO regions</b>          |                |
| - Africa                    | 22             |
| - The Americas              | 6              |
| - Eastern Mediterranean     | 9              |
| - Europe                    | 3              |
| - South-East Asia           | 22             |
| - Western Pacific           | 20             |
| <b>UNSD regions</b>         |                |
| - Africa                    | 25             |
| - The Americas              | 6              |
| - Asia                      | 29             |
| - Europe                    | 3              |
| - Oceania                   | 19             |
| <b>Income</b>               |                |
| - Low                       | 20             |
| - Lower-Middle              | 34             |
| - Upper-Middle              | 19             |
| - High                      | 9              |

Auscultation>Echo = Auscultation only for screening followed with echography confirmation; Echo>Echo: Echography +/- auscultation for screening followed with echography for confirmation; Echo>Nothing: Echography only for screening without echography confirmation; GDP = Gross national income per capita; HDI = Human Development Index; WHO: World Health Organization; WHF: World Heart Federation; UNSD: United Nations Statistic Division

**Supplementary Table 7. Individual characteristics of included studies reporting on the prevalence of rheumatic heart disease**

| Study                      | Bias     | Criteria | Year | Country       | Period     | Endemic area | GDP   | HDI   | GINI (*100) | WHO                   | UNSD    | Level of income | Design          | Population         | Setting         | Random sampling | Area  | Diagnostic criteria | Male, % | Age, years | Age range | Sample |
|----------------------------|----------|----------|------|---------------|------------|--------------|-------|-------|-------------|-----------------------|---------|-----------------|-----------------|--------------------|-----------------|-----------------|-------|---------------------|---------|------------|-----------|--------|
| <b>Abdel-Moula 1998</b>    | Low      | Others   | 1998 | Egypt         | NR         | Yes          | 1042  | 0.691 | 31.8        | Eastern Mediterranean | Africa  | 2.Lower-Middle  | Cross-sectional | School children    | School-based    | Yes             | Urban | Auscultation>Echo   |         |            |           | 5465   |
| <b>Ahmed 2005</b>          | Moderate | Others   | 2005 | Bangladesh    | 1991       | Yes          | 285   | 0.579 | 32.1        | South-East Asia       | Asia    | 2.Lower-Middle  | Cross-sectional | Children           | Both            | Yes             | Rural | Echo>Echo           |         | 12.8       | 5;15      | 5923   |
| <b>Allen 2017</b>          | Low      | WHF      | 2017 | Samoa         | 2013; 2015 | Yes          | 4179  | 0.704 | 42          | Western Pacific       | Oceania | 3.Upper-Middle  | Cross-sectional | School children    | School-based    | Yes             | NR    | Echo>Nothing        | 48.90   | 10.2       | 5;17      | 11434  |
| <b>Al-Munibari 2001</b>    | Moderate | Others   | 2001 | Yemen         | 1997-1998  | Yes          | 396   | 0.482 | 36.7        | Eastern Mediterranean | Asia    | 2.Lower-Middle  | Cross-sectional | School children    | School-based    | Yes             | Both  | Auscultation>Echo   | 49.90   |            | 5;18      | 5000   |
| <b>Anabwani 1996</b>       | Moderate | Others   | 1996 | Kenya         | NR         | Yes          | 260   | 0.555 | 48.5        | Africa                | Africa  | 2.Lower-Middle  | Cross-sectional | School children    | NR              | NR              | Rural | Echo>Nothing        |         |            |           | 1115   |
| <b>Baroux 2013</b>         | Low      | Others   | 2013 | New Caledonia | 2008; 2010 | Yes          | 12580 | NR    | NR          | Western Pacific       | Oceania | 4.High          | Cross-sectional | School children    | School-based    | Yes             | Urban | Echo>Echo           | 50.20   | 9.6        | 5;15      | 12803  |
| <b>Ba-Saddik 2012</b>      | Low      | WHO      | 2012 | Yemen         | 2004; 2005 | Yes          | 754   | 0.482 | 36.7        | Eastern Mediterranean | Asia    | 2.Lower-Middle  | Cross-sectional | School children    | School-based    | Yes             | Both  | Auscultation>Echo   | 51.00   | 11.2       | 5;16      | 6000   |
| <b>Beaton 2012</b>         | Low      | WHO      | 2012 | Uganda        | 2010       | Yes          | 595   | 0.493 | 41          | Africa                | Africa  | 1.Low           | Cross-sectional | School children    | School-based    | Yes             | Urban | Echo>Echo           | 44.00   | 9.6        | 5;16      | 4869   |
| <b>Beaton 2015</b>         | Low      | WHF      | 2015 | Uganda        | NR         | Yes          | 655   | 0.493 | 41          | Africa                | Africa  | 1.Low           | Cross-sectional | School children    | School-based    | Yes             | NR    | Echo>Echo           | 47.00   | 10.8       |           | 1420   |
| <b>Bhardwaj 2012</b>       | Moderate | Others   | 2012 | India         | NR         | Yes          | 1346  | 0.624 | 35.2        | South-East Asia       | Asia    | 2.Lower-Middle  | Cross-sectional | General population | Community-based | Yes             | Rural | Auscultation>Echo   | 48.00   | 30.4       |           | 1882   |
| <b>Bhaya 2010</b>          | Low      | WHO      | 2010 | India         | 2007; 2008 | Yes          | 1036  | 0.624 | 35.2        | South-East Asia       | Asia    | 2.Lower-Middle  | Cross-sectional | School children    | School-based    | Yes             | Urban | Echo>Echo           |         |            | 6;15      | 1059   |
| <b>Bodian 2014</b>         | Low      | WHO      | 2014 | Senegal       | 2011       | Yes          | 1082  | 0.494 | 40.3        | Africa                | Africa  | 1.Low           | Cross-sectional | School children    | School-based    | Yes             | Urban | Echo>Echo           | 60.10   | 9.7        | 5;18      | 2019   |
| <b>Campanale 2017</b>      | Low      | WHF      | 2017 | Madagascar    | 2013; 2015 | Yes          | 440   | 0.512 | 42.7        | Africa                | Africa  | 1.Low           | Cross-sectional | General population | Community-based | Yes             | Both  | Echo>Echo           |         |            | ≥ 20      | 337    |
| <b>Campanale 2017</b>      | Low      | WHF      | 2017 | Madagascar    | 2013; 2015 | Yes          | 440   | 0.512 | 42.7        | Africa                | Africa  | 1.Low           | Cross-sectional | General population | Community-based | Yes             | Both  | Echo>Echo           |         |            | 5;19      | 522    |
| <b>Carapetis 2008</b>      | Low      | WHO      | 2008 | Tonga         | 2003;2004  | Yes          | 2157  | 0.721 | 37.5        | Western Pacific       | Oceania | 3.Upper-Middle  | Cross-sectional | School children    | School-based    | Yes             | Urban | Auscultation>Echo   | 52.00   | 8.0        | 3;15      | 4794   |
| <b>Chaikitpinyo 2014</b>   | Moderate | Others   | 2014 | Thailand      | 2006       | No           | 3369  | 0.74  | 37.8        | South-East Asia       | Asia    | 3.Upper-Middle  | Cross-sectional | School children    | School-based    | Yes             | Both  | Auscultation>Echo   | 50.90   | 10.0       | 5;15      | 8555   |
| <b>Colquhoun 2014</b>      | Moderate | WHO      | 2014 | Fiji          | 2009; 2010 | Yes          | 3511  | 0.736 | 36.4        | Western Pacific       | Oceania | 3.Upper-Middle  | Cross-sectional | School children    | School-based    | Yes             | Urban | Echo>Echo           |         |            | 5;14      | 1666   |
| <b>Colquhoun 2014</b>      | Moderate | WHF      | 2014 | Fiji          | 2009; 2011 | Yes          | 3652  | 0.736 | 36.4        | Western Pacific       | Oceania | 3.Upper-Middle  | Cross-sectional | School children    | School-based    | Yes             | Urban | Echo>Echo           |         |            | 5;15      | 1666   |
| <b>Cramp 2012</b>          | Low      | Others   | 2012 | New Zealand   | 2009       | No           | 28201 | 0.915 | NR          | Western Pacific       | Oceania | 4.High          | Cross-sectional | School children    | School-based    | Yes             | Both  | Echo>Echo           |         |            | 5;17      | 685    |
| <b>El-Aroussy 2013</b>     | Low      | WHO      | 2013 | Egypt         | 2009; 2011 | Yes          | 2602  | 0.691 | 31.8        | Eastern Mediterranean | Africa  | 2.Lower-Middle  | Cross-sectional | School children    | School-based    | Yes             | Urban | Auscultation>Echo   | 49.10   | 11.1       | 6;18      | 48930  |
| <b>Engel 2015</b>          | Low      | WHF      | 2015 | Ethiopia      | 2008; 2012 | Yes          | 380   | 0.448 | 33.2        | Africa                | Africa  | 1.Low           | Cross-sectional | School children    | School-based    | Yes             | Rural | Echo>Echo           | 49.00   | 10.7       | 5;20      | 2000   |
| <b>Engel 2015</b>          | Low      | WHF      | 2015 | South Africa  | 2008; 2012 | Yes          | 7362  | 0.666 | 63.4        | Africa                | Africa  | 3.Upper-Middle  | Cross-sectional | School children    | School-based    | Yes             | Rural | Echo>Echo           | 41.00   | 12.2       | 4;24      | 2720   |
| <b>Engelman 2016</b>       | Moderate | WHF      | 2016 | Fiji          | 2012       | Yes          | 4547  | 0.736 | 36.4        | Western Pacific       | Oceania | 3.Upper-Middle  | Cross-sectional | School children    | School-based    | Yes             | Urban | Echo>Echo           | 48.60   | 10.0       | 5;15      | 2004   |
| <b>Fakakovikaetau 2016</b> | Low      | WHF      | 2016 | Tonga         | 2008; 2015 | Yes          | 4273  | 0.721 | 37.5        | Western Pacific       | Oceania | 3.Upper-Middle  | Cross-sectional | Children           | Community-based | Yes             | Both  | Echo>Echo           |         |            | 5;14      | 36990  |
| <b>Farrag 2014</b>         | Low      | WHO      | 2014 | Egypt         | NR         | Yes          | 3181  | 0.691 | 31.8        | Eastern Mediterranean | Africa  | 2.Lower-Middle  | Cross-sectional | School children    | School-based    | Yes             | NR    | Echo>Echo           | 49.10   |            | 6;18      | 48930  |

| Study                    | Bias     | Criteria | Year | Country         | Period     | Endemic area | GDP   | HDI   | GINI (*100) | WHO                   | UNSD         | Level of income | Design          | Population         | Setting         | Random sampling | Area  | Diagnostic criteria | Male, % | Age, years | Age range | Sample |
|--------------------------|----------|----------|------|-----------------|------------|--------------|-------|-------|-------------|-----------------------|--------------|-----------------|-----------------|--------------------|-----------------|-----------------|-------|---------------------|---------|------------|-----------|--------|
| <b>Gautam 2014</b>       | High     | WHO      | 2014 | Nepal           | 2006; 2007 | Yes          | 8226  | 0.558 | 32.8        | South-East Asia       | Asia         | 1.Low           | Cross-sectional | School children    | School-based    | Yes             | NR    | Auscultation>Echo   |         |            | 5;15      | 2043   |
| <b>Gemechu 2017</b>      | Low      | WHF      | 2017 | Ethiopia        | NR         | Yes          | 660   | 0.448 | 33.2        | Africa                | Africa       | 1.Low           | Cross-sectional | General population | Community-based | Yes             | Rural | Echo>Nothing        | 46.00   | 13.2       | 6;25      | 987    |
| <b>Gul 2009</b>          | Low      | WHO      | 2009 | Pakistan        | 2006       | Yes          | 874   | 0.55  | 30.7        | Eastern Mediterranean | Asia         | 2.Lower-Middle  | Cross-sectional | School children    | School-based    | Yes             | Urban | Auscultation>Echo   |         | 13.3       | 6;16      | 1773   |
| <b>Huang 2017</b>        | Low      | WHF      | 2017 | Samoa           | NR         | Yes          | 4149  | 0.704 | 42          | Western Pacific       | Oceania      | 3.Upper-Middle  | Cross-sectional | School children    | School-based    | Yes             | Both  | Echo>Echo           | 48.00   | 11.3       | 5;18      | 1058   |
| <b>Jose 2003</b>         | Moderate | Others   | 2003 | India           | 2001; 2002 | Yes          | 457   | 0.624 | 35.2        | South-East Asia       | Asia         | 2.Lower-Middle  | Cross-sectional | School children    | School-based    | Yes             | Rural | Auscultation>Echo   | 51.07   |            | 6;18      | 229829 |
| <b>Kane 2013</b>         | Moderate | Others   | 2013 | Senegal         | 2010       | Yes          | 1002  | 0.494 | 42          | Africa                | Africa       | 1.Low           | Cross-sectional | School children    | School-based    | Yes             | Urban | Echo>Echo           | 51.60   |            | 5;18      | 2004   |
| <b>Kaul 2005</b>         | Low      | WHO      | 2005 | India           | 1999; 2000 | Yes          | 439   | 0.624 | 35.2        | South-East Asia       | Asia         | 2.Lower-Middle  | Cross-sectional | School children    | School-based    | Yes             | Rural | Auscultation>Echo   |         |            | 5;15      | 4125   |
| <b>Kennedy 2014</b>      | Low      | WHF      | 2014 | Solomon Islands | NR         | Yes          | 1859  | 0.515 | 37          | Western Pacific       | Oceania      | 2.Lower-Middle  | Cross-sectional | School children    | School-based    | Yes             | Urban | Echo>Echo           |         |            | 5;15      | 700    |
| <b>Kumari 2013</b>       | Low      | WHO      | 2013 | India           | 2011       | Yes          | 1462  | 0.624 | 35.2        | South-East Asia       | Asia         | 2.Lower-Middle  | Cross-sectional | School children    | School-based    | Yes             | Both  | Echo>Echo           | 53.05   |            | 5;16      | 4213   |
| <b>Kwok 2015</b>         | Low      | WHF      | 2015 | Angola          | 2013       | Yes          | 2760  | 0.533 | 42.7        | Africa                | Africa       | 2.Lower-Middle  | Cross-sectional | Children           | Community-based | Yes             | Both  | Echo>Echo           | 44.20   | 10.1       | 4;20      | 574    |
| <b>Ledos 2015</b>        | Low      | WHF      | 2015 | New Caledonia   | 2010       | Yes          | 12580 | NR    | NR          | Western Pacific       | Oceania      | 4.High          | Cross-sectional | Young adults       | Community-based | Yes             | Urban | Echo>Nothing        | 55.00   | 20.0       | 18;22     | 834    |
| <b>Longo-Mbenza 1998</b> | Low      | WHO      | 1998 | Congo           | 1996       | Yes          | 450   | 0.592 | 48.9        | Africa                | Africa       | 1.Low           | Cross-sectional | School children    | School-based    | Yes             | Both  | Echo>Echo           |         | 10.6       | 5;16      | 4848   |
| <b>Lu 2015</b>           | Moderate | WHF      | 2015 | Uganda          | NR         | Yes          | 655   | 0.493 | 41          | Africa                | Africa       | 1.Low           | Cross-sectional | School children    | School-based    | Yes             | Both  | Echo>Echo           | 47.00   | 10.8       | 5;17      | 4773   |
| <b>Mahmoudi 2003</b>     | Low      | WHO      | 2003 | Iran            | NR         | No           | 1891  | 0.774 | 38.8        | Eastern Mediterranean | Asia         | 3.Upper-Middle  | Cross-sectional | School children    | School-based    | Yes             | Urban | Auscultation>Echo   | 62.10   |            | 7;18      | 167786 |
| <b>Marijon 2007</b>      | Low      | WHO      | 2007 | Cambodia        | 2001; 2002 | Yes          | 330   | 0.563 | 30.76       | Western Pacific       | Asia         | 2.Lower-Middle  | Cross-sectional | School children    | School-based    | Yes             | Urban | Auscultation>Echo   | 52.00   | 11.7       | 6;17      | 3677   |
| <b>Marijon 2007</b>      | Moderate | WHO      | 2007 | Mozambique      | 2005       | Yes          | 350   | 0.418 | 45.6        | Africa                | Africa       | 1.Low           | Cross-sectional | School children    | School-based    | Yes             | Urban | Auscultation>Echo   | 47.50   | 10.6       | 6;17      | 2170   |
| <b>Mirabel 2015</b>      | Low      | WHF      | 2015 | New Caledonia   | 2008; 2011 | Yes          | 12580 | NR    | NR          | Western Pacific       | Oceania      | 4.High          | Cross-sectional | School children    | School-based    | Yes             | Urban | Echo>Echo           |         |            | 9;10      | 17633  |
| <b>Misra 2007</b>        | Low      | Others   | 2007 | India           | NR         | Yes          | 707   | 0.624 | 35.2        | South-East Asia       | Asia         | 2.Lower-Middle  | Cross-sectional | School children    | NR              | NR              | NR    | Auscultation>Echo   | 57.80   |            | 4;18      | 118212 |
| <b>Mucumbitsi 2017</b>   | Moderate | WHF      | 2017 | Rwanda          | NR         | Yes          | 710   | 0.498 | 50.4        | Africa                | Africa       | 1.Low           | Cross-sectional | School children    | School-based    | Yes             | Urban | Echo>Echo           |         | 11.2       | 6;16      | 2501   |
| <b>Mulatu 2015</b>       | Low      | WHO      | 2015 | Ethiopia        | 2013       | Yes          | 470   | 0.448 | 33.2        | Africa                | Africa       | 1.Low           | Cross-sectional | School children    | School-based    | Yes             | Rural | Auscultation>Echo   | 48.99   | 8.9        | 5;15      | 1874   |
| <b>Nair 2015</b>         | Moderate | WHF      | 2015 | India           | 2013; 2014 | Yes          | 1513  | 0.624 | 35.2        | South-East Asia       | Asia         | 2.Lower-Middle  | Cross-sectional | School children    | School-based    | Yes             | Urban | Auscultation>Echo   | 64.80   | 12.6       | 5;15      | 2060   |
| <b>Nascimento 2016</b>   | Low      | WHF      | 2016 | Brazil          | 2014; 2015 | No           | 10392 | 0.754 | 51.3        | The Americas          | The Americas | 3.Upper-Middle  | Cross-sectional | School children    | School-based    | Yes             | Urban | Auscultation>Echo   | 41.00   | 11.9       |           | 5996   |
| <b>Negi 2013</b>         | Low      | WHO      | 2013 | India           | 2007; 2008 | Yes          | 1005  | 0.624 | 35.2        | South-East Asia       | Asia         | 2.Lower-Middle  | Cross-sectional | School children    | School-based    | Yes             | Both  | Auscultation>Echo   | 59.00   | 11.1       | 5;15      | 15145  |
| <b>Ngaidé 2015</b>       | Moderate | WHF      | 2015 | Senegal         | 2011       | Yes          | 1082  | 0.494 | 40.3        | Africa                | Africa       | 1.Low           | Cross-sectional | School children    | School-based    | Yes             | Urban | Echo>Echo           | 60.10   | 9.7        | 5;18      | 2019   |
| <b>Oli 1999</b>          | Low      | Others   | 1999 | Ethiopia        | NR         | Yes          | 140   | 0.448 | 33.2        | Africa                | Africa       | 1.Low           | Cross-sectional | School children    | School-based    | Yes             | Urban | Auscultation>Echo   |         |            |           | 9388   |
| <b>Paar 2010</b>         | Low      | WHO      | 2010 | Nicaragua       | 2006; 2009 | Yes          | 8724  | 0.645 | 46.6        | The Americas          | The Americas | 2.Lower-Middle  | Cross-sectional | Adults             | Community-based | Yes             | Both  | Echo>Echo           | 38.00   | 27.4       | 20;35.9   | 489    |
| <b>Paar 2010</b>         | Moderate | WHO      | 2010 | Nicaragua       | 2006; 2009 | Yes          | 8724  | 0.645 | 46.6        | The Americas          | The Americas | 2.Lower-Middle  | Cross-sectional | School children    | School-based    | Yes             | Both  | Echo>Echo           | 51.00   | 9.5        | 5;15      | 3150   |

| Study            | Bias     | Criteria | Year | Country     | Period     | Endemic area | GDP   | HDI   | GINI (*100) | WHO                   | UNSD         | Level of income | Design          | Population          | Setting         | Random sampling | Area  | Diagnostic criteria | Male, % | Age, years | Age range | Sample |
|------------------|----------|----------|------|-------------|------------|--------------|-------|-------|-------------|-----------------------|--------------|-----------------|-----------------|---------------------|-----------------|-----------------|-------|---------------------|---------|------------|-----------|--------|
| Periwal 2006     | Low      | Others   | 2006 | India       | NR         | Yes          | 621   | 0.624 | 35.2        | South-East Asia       | Asia         | 2.Lower-Middle  | Cross-sectional | School children     | School-based    | Yes             | Urban | Auscultation>Echo   | 61.00   |            | 5;14      | 3002   |
| Ploutz 2016      | Moderate | WHF      | 2016 | Uganda      | 2014       | Yes          | 703   | 0.493 | 41          | Africa                | Africa       | 1.Low           | Cross-sectional | School children     | School-based    | Yes             | NR    | Echo>Echo           | 42.10   | 11.1       | 5;17      | 956    |
| Poyyamozi 2016   | Moderate | Others   | 2016 | India       | 2005; 2006 | Yes          | 750   | 0.624 | 35.2        | South-East Asia       | Asia         | 2.Lower-Middle  | Cross-sectional | School children     | Community-based | Yes             | Urban | Auscultation>Echo   | 55.00   |            | 5;17      | 7137   |
| Regmi 1997       | Moderate | WHO      | 1997 | India       | NR         | Yes          | 370   | 0.624 | 35.2        | South-East Asia       | Asia         | 2.Lower-Middle  | Cross-sectional | School children     | School-based    | Yes             | Urban | Auscultation>Echo   |         |            | 5;16      | 4736   |
| Rizvi 2003       | Moderate | Others   | 2003 | Pakistan    | 1993; 1994 | Yes          | 437   | 0.55  | 30.7        | Eastern Mediterranean | Asia         | 2.Lower-Middle  | Cross-sectional | General population  | Community-based | Yes             | Rural | Auscultation>Echo   | 53.10   |            |           | 9483   |
| Roberts 2014     | Low      | WHF      | 2014 | Australia   | 2008; 2010 | No           | 40911 | 0.939 | 34.7        | Western Pacific       | Oceania      | 4.High          | Cross-sectional | General population  | Community-based | Yes             | Rural | Echo>Echo           | 50.90   | 9.3        | 5;15      | 3946   |
| Roberts 2014     | Moderate | WHF      | 2014 | Australia   | 2008; 2010 | No           | 40911 | 0.939 | 34.7        | Western Pacific       | Oceania      | 4.High          | Cross-sectional | School children     | School-based    | Yes             | Urban | Echo>Echo           | 48.80   | 9.4        | 5;15      | 1053   |
| Rossi 2014       | Low      | WHF      | 2014 | Italy       | NR         | No           | 34814 | 0.887 | 34.7        | Europe                | Europe       | 4.High          | Cross-sectional | School children     | School-based    | Yes             | NR    | Echo>Echo           | 54.10   | 16.7       |           | 684    |
| Sadiq 2009       | Low      | Others   | 2009 | Pakistan    | 2001; 2002 | Yes          | 506   | 0.55  | 30.7        | Eastern Mediterranean | Asia         | 2.Lower-Middle  | Cross-sectional | School children     | School-based    | Yes             | Urban | Auscultation>Echo   | 38.50   | 10.7       | 5;15      | 24980  |
| Sadoh 2013       | Moderate | WHO      | 2013 | Nigeria     | 2011; 2012 | Yes          | 2876  | 0.527 | 43          | Africa                | Africa       | 2.Lower-Middle  | Cross-sectional | School children     | School-based    | Yes             | Urban | Auscultation>Echo   | 48.98   | 8.9        | 5;15      | 1764   |
| Sanyahumbi 2016  | Moderate | WHF      | 2016 | Malawi      | 2014       | Yes          | 350   | 0.476 | 46.1        | Africa                | Africa       | 1.Low           | Cross-sectional | Children            | Both            | Yes             | Both  | Echo>Echo           | 47.17   |            | 5;16      | 1450   |
| Satupaitea 2012  | Moderate | WHF      | 2012 | Samoa       | 2008; 2012 | Yes          | 3453  | 0.704 | 42          | Western Pacific       | Oceania      | 3.Upper-Middle  | Cross-sectional | School children     | School-based    | Yes             | Both  | Echo>Echo           |         |            | 3;16      | 8457   |
| Saxena 2011      | Low      | WHO      | 2014 | India       | 2008; 2010 | Yes          | 1090  | 0.624 | 35.2        | South-East Asia       | Asia         | 2.Lower-Middle  | Cross-sectional | School children     | School-based    | Yes             | Rural | Echo>Echo           | 52.65   | 10.8       | 5;15      | 6270   |
| Saxena 2017      | Low      | WHF      | 2017 | India       | 2010; 2013 | Yes          | 1447  | 0.624 | 35.2        | South-East Asia       | Asia         | 2.Lower-Middle  | Cross-sectional | School children     | School-based    | Yes             | Both  | Echo>Echo           | 55.10   | 10.8       | 5;15      | 16294  |
| Schaffer 2003    | Low      | Others   | 2003 | USA         | 1993; 1995 | No           | 27777 | 0.92  | 41          | The Americas          | The Americas | 4.High          | Cross-sectional | Adults              | Community-based | Yes             | Rural | Echo>Echo           |         |            | 45;74     | 3501   |
| Shrestha 2016    | Moderate | WHF      | 2016 | Nepal       | 2012; 2014 | Yes          | 10719 | 0.558 | 32.8        | South-East Asia       | Asia         | 1.Low           | Cross-sectional | School children     | School-based    | Yes             | Both  | Echo>Echo           | 51.70   | 10.0       | 5;15      | 5178   |
| Singh 2014       | Low      | WHF      | 2014 | India       | NR         | Yes          | 1447  | 0.624 | 35.2        | South-East Asia       | Asia         | 2.Lower-Middle  | Cross-sectional | School children     | School-based    | Yes             | Both  | Echo>Echo           | 52.77   | 11.2       | 5;15      | 3015   |
| Spitzer 2015     | Low      | WHF      | 2015 | Peru        | 2014       | No           | 6491  | 0.74  | 44.3        | The Americas          | The Americas | 3.Upper-Middle  | Cross-sectional | School children     | School-based    | Yes             | Both  | Echo>Echo           | 50.00   | 11.0       | 6;15      | 1023   |
| Spitzer 2015     | Low      | WHO      | 2015 | Peru        | 2014       | No           | 6491  | 0.74  | 44.3        | The Americas          | The Americas | 3.Upper-Middle  | Cross-sectional | School children     | School-based    | Yes             | Both  | Echo>Echo           | 50.00   | 11.0       | 6;15      | 1023   |
| Sriharibabu 2013 | Moderate | Others   | 2013 | India       | 2007; 2012 | Yes          | 1236  | 0.624 | 35.2        | South-East Asia       | Asia         | 2.Lower-Middle  | Cross-sectional | Children and Adults | Community-based | Yes             | Rural | Auscultation>Echo   | 30.00   | 33.0       | 15;64     | 44164  |
| Steer 2009       | Moderate | WHO      | 2009 | Fiji        | 2006       | Yes          | 3750  | 0.736 | 36.4        | Western Pacific       | Oceania      | 3.Upper-Middle  | Cross-sectional | School children     | School-based    | Yes             | Urban | Auscultation>Echo   |         |            | 5;15      | 3462   |
| Thakur 1996      | Low      | WHO      | 1996 | India       | 1992; 1993 | Yes          | 306   | 0.624 | 35.2        | South-East Asia       | Asia         | 2.Lower-Middle  | Cross-sectional | School children     | School-based    | Yes             | Both  | Auscultation>Echo   | 54.00   |            | 5;16      | 15080  |
| Uner 2009        | Moderate | Others   | 2009 | Turkey      | 2003; 2004 | No           | 5380  | 0.767 | 41.2        | Europe                | Europe       | 3.Upper-Middle  | Cross-sectional | School children     | School-based    | Yes             | Urban | Auscultation>Echo   | 55.00   | 10.0       | 6;15      | 6035   |
| Viali 2016       | Low      | WHF      | 2016 | Samoa       | 2013       | Yes          | 4219  | 0.704 | 42          | Western Pacific       | Oceania      | 3.Upper-Middle  | Cross-sectional | School children     | School-based    | Yes             | NR    | Echo>Echo           |         |            | 14;18     | 5197   |
| Webb 2011        | Low      | WHO      | 2011 | New Zealand | NR         | No           | 28201 | 0.915 | NR          | Western Pacific       | Oceania      | 4.High          | Cross-sectional | School children     | School-based    | Yes             | Urban | Echo>Echo           | 56.00   |            | 10;13     | 1142   |
| Yadav 2010       | Moderate | WHO      | 2010 | India       | 2010       | Yes          | 1346  | 0.624 | 35.2        | South-East Asia       | Asia         | 2.Lower-Middle  | Cross-sectional | School children     | School-based    | Yes             | Urban | Auscultation>Echo   | 62.10   |            | 5;16      | 9526   |
| Yadeta 2016      | Low      | WHF      | 2016 | Ethiopia    | 2013; 2014 | Yes          | 550   | 0.448 | 33.2        | Africa                | Africa       | 1.Low           | Cross-sectional | School children     | School-based    | Yes             | Both  | Echo>Echo           | 52.00   | 13.2       | 6;18      | 3238   |

| Study              | Bias     | Criteria | Year | Country    | Period     | Endemic area | GDP   | HDI   | GINI (*100) | WHO             | UNSD    | Level of income | Design          | Population      | Setting         | Random sampling | Area | Diagnostic criteria | Male, % | Age, years | Age range | Sample |
|--------------------|----------|----------|------|------------|------------|--------------|-------|-------|-------------|-----------------|---------|-----------------|-----------------|-----------------|-----------------|-----------------|------|---------------------|---------|------------|-----------|--------|
| <b>Yildiz 2016</b> | Low      | WHO      | 2016 | Turkey     | NR         | No           | 12127 | 0.767 | 41.2        | Europe          | Europe  | 3.Upper-Middle  | Cross-sectional | School children | School-based    | Yes             | NR   | Echo>Nothing        | 50.66   |            | 5;15      | 5440   |
| <b>Zaman 2015</b>  | Moderate | Others   | 2015 | Bangladesh | 2005       | Yes          | 484   | 0.579 | 32.1        | South-East Asia | Asia    | 2.Lower-Middle  | Cross-sectional | School children | School-based    | Yes             | Both | Echo>Echo           | 51.00   | 11.0       | 5;19      | 56827  |
| <b>Zhimin 2006</b> | Low      | Others   | 2006 | China      | 2001; 2002 | Yes          | 1101  | 0.738 | 42.2        | Western Pacific | Oceania | 3.Upper-Middle  | Cross-sectional | Adults          | Community-based | Yes             | Both | Echo>Echo           |         | 48.3       | 27;71     | 8080   |

WHF: World Heart Federation; WHO: World Heart Organization; UNSD: United Nations Statistical Divisions; Auscultation>Echo = Auscultation only for screening followed with echography confirmation; Echo>Echo: Echography +/- auscultation for screening followed with echography for confirmation; E>N: Echography only for screening without echography confirmation; NR = not reported; GDP: gross domestic per capita; HDI: human development index



**Supplementary Table 8. Individual characteristics of included studies reporting on the evolution of clinically rheumatic heart disease**

| Study, year of publication | Continent | Region    | Country       | WHO Region      | Area  | Median duration of follow up (months) | Study design | Data collection | Sampling method | Male (%) | Mean or Median age (years) | Age range (years) | Sample size | Proportion of participants on BPG | Adherence (%) | Number of cases at onset of follow-up |            |      | Predictors of stable and/progressed lesions                                                                                             |
|----------------------------|-----------|-----------|---------------|-----------------|-------|---------------------------------------|--------------|-----------------|-----------------|----------|----------------------------|-------------------|-------------|-----------------------------------|---------------|---------------------------------------|------------|------|-----------------------------------------------------------------------------------------------------------------------------------------|
|                            |           |           |               |                 |       |                                       |              |                 |                 |          |                            |                   |             |                                   |               | Definite RHD                          | Borderline | NSVA |                                                                                                                                         |
| <b>Beaton 2014</b>         | Africa    | East      | Uganda        | Africa          | Both  | 25                                    | Cohort       | Prospective     | Consecutive     | 40       | 9.6                        | 5;13              | 60          | 23                                | 85.3          | 8                                     | 43         | 9    | Younger children; Increasing morphologic changes; Higher ASLO titres                                                                    |
| <b>Beaton 2017</b>         | Africa    | East      | Uganda        | Africa          | Both  | 27.6                                  | Cohort       | Prospective     | Consecutive     | 30.6     | 12                         | 10;14             | 227         | 49.3                              | 82.4          | 63                                    | 164        | .    | Younger children (AOR = 0.83); Presence of a functional AV abnormality (AOR= 5.37)                                                      |
| <b>Bertaina 2016</b>       | Europe    | North     | New Caledonia | Western Pacific | Urban | 23                                    | Cohort       | Prospective     | NR              | 32       | 9.8                        | NR                | 25          | NR                                | NR            | 0                                     | 25         | 0    | NR                                                                                                                                      |
| <b>Bhaya 2011</b>          | Asia      | Southeast | India         | Southeast Asia  | NR    | 24                                    | Cohort       | Prospective     | NR              | NR       | NR                         | 6;15              | 39          | 100                               | NR            | 0                                     | 39         | 0    | NR                                                                                                                                      |
| <b>Engelman 2016</b>       | Oceania   | North     | Fiji          | Western Pacific | Both  | 90                                    | Cohort       | Prospective     | Consecutive     | 32.6     | 17                         | 8.5;12.0          | 98          | 59.2                              | 2             | 20                                    | 17         | 21   | Cases with a duration of diagnosis of at least five years                                                                               |
| <b>Mirabel 2015</b>        | Europe    | West      | New Caledonia | Western Pacific | Both  | 31                                    | Cohort       | Prospective     | Consecutive     | 47.4     | 9.9                        | 9;10              | 114         | 88.6                              | NR            | 114                                   | 0          | 0    | NR                                                                                                                                      |
| <b>Reymond 2015</b>        | Oceania   | South     | Australia     | Western Pacific | Both  | 3.7                                   | Cohort       | Prospective     | Consecutive     | 41       | 13.7                       | 8;18              | 117         | 18.8                              | NR            | 0                                     | 55         | 62   | Borderline RHD of the MV; Borderline RHD of the AV; Non-specific valvular abnormalities; In receipt of secondary antibiotic prophylaxis |
| <b>Saxena 2011</b>         | Asia      | Southeast | India         | Southeast Asia  | Rural | 15.4                                  | Cohort       | Prospective     | NR              | 52.7     | 10.8                       | 5;15              | 100         | NR                                | NR            | 100                                   | 0          | 0    | NR                                                                                                                                      |
| <b>Zuhlke 2016</b>         | Africa    | South     | South Africa  | Africa          | Urban | 60.8                                  | Cohort       | Prospective     | Consecutive     | 14       | 13.8                       | NR                | 44          | NR                                | NR            | 10                                    | 34         | 0    | Presence of pathological MR                                                                                                             |

ASLO = Antistreptolysin O antigen; AOR = Adjusted odd's ratio; AV = Aortic valve; MR = Mitral regurgitation; BPG = Benzathine penicillin G; RHD = Rheumatic heart disease; NSVA = Non-specific valvular abnormality; NR = Not reported

**Supplementary Table 9. Summary statistics from meta-analyses of prevalence studies on rheumatic heart disease, by subgroup**

| Subgroups           | Criteria      | N Studies | N Participants | Prevalence, per 1000 (95%CI) | Prediction interval | I <sup>2</sup> (95%CI) | H (95%CI)        | p heterogeneity | p Egger test | p difference subgroups |
|---------------------|---------------|-----------|----------------|------------------------------|---------------------|------------------------|------------------|-----------------|--------------|------------------------|
| Income              |               |           |                |                              |                     |                        |                  |                 |              |                        |
| <b>Low</b>          | <b>WHF</b>    | 12        | 25381          | 31.0 (18.2-46.9)             | 0.0-113.3           | 97.6 (96.8-98.2)       | 6.5 (5.6-7.5)    | < 0.0001        | 0.288        | 0.003                  |
| <b>Lower-Middle</b> |               | 5         | 22643          | 10.9 (5.8-17.7)              | 0.0-43.1            | 89.8 (78.9-95.0)       | 3.1 (2.2-4.5)    | < 0.0001        | 0.346        |                        |
| <b>Upper-Middle</b> |               | 10        | 76545          | 31.7 (21.0-44.6)             | 2.4-92.1            | 98.6 (98.1-98.9)       | 8.4 (7.3-9.6)    | < 0.0001        | 0.376        |                        |
| <b>High</b>         |               | 5         | 24150          | 20.8 (8.5-38.1)              | 0.0-114.5           | 97.2 (95.4-98.3)       | 5.9 (4.6-7.6)    | < 0.0001        | 0.278        |                        |
| WHO                 |               |           |                |                              |                     |                        |                  |                 |              |                        |
| <b>Low</b>          | <b>WHO</b>    | 6         | 17823          | 9.8 (4.2-17.7)               | 0.0-49.1            | 95.0 (91.6-97.1)       | 4.5 (3.4-5.8)    | < 0.0001        | 0.367        | < 0.0001               |
| <b>Lower-Middle</b> |               | 16        | 174867         | 9.6 (5.2-15.3)               | 0.0-44.3            | 99.0 (98.7-99.1)       | 9.8 (8.9-10.7)   | < 0.0001        | 0.050        |                        |
| <b>Upper-Middle</b> |               | 6         | 184171         | 13.5 (1.8-35.7)              | 0.0-144.8           | 99.5 (99.4-99.6)       | 14.4 (12.7-16.2) | < 0.0001        | 0.020        |                        |
| <b>High</b>         |               | 1         | 1142           | 51.7 (39.5-65.3)             | NA                  | NA                     | NA               | NA              | NA           |                        |
| A>E                 |               |           |                |                              |                     |                        |                  |                 |              |                        |
| <b>Low</b>          | <b>A&gt;E</b> | 4         | 15475          | 8.2 (1.7-19.3)               | 0.0-101.4           | 96.5 (93.6-98.1)       | 5.4 (4.0-7.3)    | < 0.0001        | 0.821        | 0.737                  |
| <b>Lower-Middle</b> |               | 21        | 561970         | 5.5 (3.0-8.6)                | 0.0-27.8            | 99.3 (99.2-99.4)       | 12.3 (11.5-13.1) | < 0.0001        | 0.022        |                        |
| <b>Upper-Middle</b> |               | 6         | 196628         | 8.6 (0.5-25.9)               | 0.0-117.4           | 99.7 (99.6-99.7)       | 17.6 (15.8-19.5) | < 0.0001        | 0.087        |                        |
| <b>High</b>         |               | 0         | NA             | NA                           | NA                  | NA                     | NA               | NA              | NA           |                        |
| E>E                 |               |           |                |                              |                     |                        |                  |                 |              |                        |
| <b>Low</b>          | <b>E&gt;E</b> | 15        | 38134          | 23.3 (14.5-33.7)             | 0.0-81.8            | 97.4 (96.6-98.0)       | 6.2 (5.4-7.0)    | < 0.0001        | 0.317        | 0.212                  |
| <b>Lower-Middle</b> |               | 12        | 147444         | 13.5 (7.6-21.0)              | 0.0-52.8            | 99.0 (98.7-99.2)       | 9.8 (8.8-10.9)   | < 0.0001        | 0.008        |                        |
| <b>Upper-Middle</b> |               | 11        | 69884          | 27.2 (14.1-44.5)             | 0.0-118.0           | 99.1 (98.9-99.3)       | 10.8 (9.7-12.0)  | < 0.0001        | 0.378        |                        |
| <b>High</b>         |               | 8         | 41447          | 21.5 (12.7-32.5)             | 0.3-71.7            | 97.4 (96.2-98.2)       | 6.2 (5.2-7.4)    | < 0.0001        | 0.066        |                        |
| Endemic area        |               |           |                |                              |                     |                        |                  |                 |              |                        |
| <b>Endemic</b>      | <b>WHF</b>    | 27        | 136017         | 26.5 (18.9-35.4)             | 0.4-89.1            | 98.8 (98.6-98.9)       | 9.0 (8.4-9.7)    | < 0.0001        | 0.981        | 0.801                  |
| <b>Non endemic</b>  |               | 5         | 12702          | 23.9 (9.2-45.2)              | 0.0-141.0           | 97.3 (95.6-98.3)       | 6.1 (4.8-7.8)    | < 0.0001        | 0.478        |                        |
| WHO                 |               |           |                |                              |                     |                        |                  |                 |              |                        |
| <b>Endemic</b>      | <b>WHO</b>    | 25        | 202612         | 11.2 (7.0-16.3)              | 0.0-48.6            | 98.8 (98.7-99.0)       | 9.3 (8.6-10.0)   | < 0.0001        | 0.006        | 0.882                  |
| <b>Non endemic</b>  |               | 4         | 175391         | 12.4 (1.1-35.3)              | 0.0-218.1           | 99.2 (98.8-99.4)       | 10.9 (9.0-13.2)  | < 0.0001        | 0.032        |                        |
| A>E                 |               |           |                |                              |                     |                        |                  |                 |              |                        |
| <b>Endemic</b>      | <b>A&gt;E</b> | 27        | 585701         | 6.8 (4.1-9.9)                | 0.0-29.2            | 99.3 (99.2-99.4)       | 11.9 (11.2-12.6) | < 0.0001        | 0.004        | 0.700                  |
| <b>Non endemic</b>  |               | 4         | 188372         | 4.5 (0.0-20.0)               | 0.0-175.8           | 99.7 (99.5-99.7)       | 17.1 (14.9-19.7) | < 0.0001        | 0.349        |                        |
| E>E                 |               |           |                |                              |                     |                        |                  |                 |              |                        |
| <b>Endemic</b>      | <b>E&gt;E</b> | 38        | 283852         | 20.9 (14.4-28.5)             | 0.0-88.5            | 99.4 (99.3-99.4)       | 12.7 (12.2-13.3) | < 0.0001        | 0.013        | 0.812                  |
| <b>Non endemic</b>  |               | 8         | 13057          | 22.8 (10.0-40.4)             | 0.0-110.1           | 96.8 (95.3-97.9)       | 5.6 (4.6-6.8)    | < 0.0001        | 0.352        |                        |
| UNSD Regions        |               |           |                |                              |                     |                        |                  |                 |              |                        |
| <b>Africa</b>       | <b>WHF</b>    | 13        | 23497          | 32.0 (20.2-46.4)             | 0.5-106.5           | 96.8 (95.7-97.7)       | 5.6 (4.8-6.5)    | < 0.0001        | 0.560        | < 0.0001               |
| <b>Asia</b>         |               | 4         | 26547          | 7.0 (4.8-9.5)                | 0.5-20.4            | 73.7 (26.4-90.6)       | 1.9 (1.2-3.3)    | < 0.0001        | 0.606        |                        |
| <b>Europe</b>       |               | 1         | 684            | 74.6 (56.0-95.5)             | NA                  | NA                     | NA               | < 0.0001        | NA           |                        |
| <b>Oceania</b>      |               | 12        | 90972          | 27.2 (16.5-40.5)             | 0.1-95.4            | 99.0 (98.8-99.2)       | 10.2 (9.2-11.3)  | < 0.0001        | 0.647        |                        |
| <b>The Americas</b> |               | 2         | 7019           | 18.4 (0.0-73.1)              | NA                  | 98.5 (0.0-73.1)        | 8.3              | < 0.0001        | NA           |                        |

|                              |               |    |        |                  |           |                  |                  |          |        |          |
|------------------------------|---------------|----|--------|------------------|-----------|------------------|------------------|----------|--------|----------|
| <b>Africa</b>                | <b>WHO</b>    | 8  | 115404 | 7.1 (3.9-11.4)   | 0.0-26.9  | 97.5 (96.4-98.3) | 6.3 (5.3-7.6)    | < 0.0001 | 0.105  | 0.0003   |
| <b>Asia</b>                  |               | 13 | 241433 | 7.7 (2.8-14.9)   | 0.0-52.6  | 99.3 (99.2-99.4) | 12.2 (11.2-13.3) | < 0.0001 | 0.005  |          |
| <b>Europe</b>                |               | 1  | 5440   | 5.1 (3.4-7.2)    | NA        | NA               | NA               | NA       | NA     |          |
| <b>Oceania</b>               |               | 4  | 11064  | 30.8 (13.1-55.4) | 0.0-207.6 | 97.4 (95.5-98.5) | 6.2 (4.7-8.2)    | < 0.0001 | 0.714  |          |
| <b>The Americas</b>          |               | 3  | 4662   | 29.3 (12.9-52.0) | 0.0-603.4 | 91.3 (77.4-96.6) | 3.4 (2.1-5.4)    | < 0.0001 | 0.322  |          |
| <b>Africa</b>                | <b>A&gt;E</b> | 6  | 69591  | 6.1 (2.5-11.2)   | 0.0-31.7  | 96.7 (94.8-97.9) | 5.5 (4.4-7.0)    | < 0.0001 | 0.286  | < 0.0001 |
| <b>Asia</b>                  |               | 21 | 684195 | 4.9 (2.7-7.8)    | 0.0-23.8  | 99.4 (99.4-99.5) | 13.3 (12.5-14.1) | < 0.0001 | 0.016  |          |
| <b>Europe</b>                |               | 1  | 6035   | 1.2 (0.4-2.2)    | NA        | NA               | NA               | NA       | NA     |          |
| <b>Oceania</b>               |               | 2  | 8256   | 20.8 (1.6-60.1)  | NA        | 98.9 (97.7-99.4) | 9.4              | < 0.0001 | NA     |          |
| <b>The Americas</b>          |               | 1  | 5996   | 41.8 (36.9-47.1) | NA        | NA               | NA               | NA       | NA     |          |
| <b>Africa</b>                | <b>E&gt;E</b> | 17 | 85180  | 22.5 (13.1-34.4) | 0.0-95.1  | 98.7 (98.4-98.9) | 8.8 (8.0-9.7)    | < 0.0001 | 0.0008 | < 0.0001 |
| <b>Asia</b>                  |               | 8  | 98779  | 9.2 (3.5-17.4)   | 0.0-52.3  | 99.0 (98.6-99.2) | 9.8 (8.5-11.2)   | < 0.0001 | 0.024  |          |
| <b>Europe</b>                |               | 1  | 684    | 74.6 (56.0-95.5) | NA        | NA               | NA               | NA       | NA     |          |
| <b>Oceania</b>               |               | 15 | 103080 | 27.2 (16.2-40.9) | 0.0-105.9 | 99.2 (99.1-99.4) | 11.5 (10.5-12.5) | < 0.0001 | 0.859  |          |
| <b>The Americas</b>          |               | 5  | 9186   | 16.4 (2.9-39.8)  | 0.0-160.0 | 97.7 (96.3-98.5) | 6.6 (5.2-8.3)    | < 0.0001 | 0.921  |          |
| WHO Regions                  |               |    |        |                  |           |                  |                  |          |        |          |
| <b>Africa</b>                | <b>WHF</b>    | 13 | 23497  | 32.0 (20.2-46.4) | 0.5-106.5 | 96.8 (95.7-97.7) | 5.6 (4.8-6.5)    | < 0.0001 | 0.560  | < 0.0001 |
| <b>The Americas</b>          |               | 2  | 7019   | 18.4 (0.0-73.1)  | NA        | 98.5 (96.8-99.3) | 8.3              | < 0.0001 | NA     |          |
| <b>Eastern Mediterranean</b> |               | 0  | NA     | NA               | NA        | NA               | NA               | NA       | NA     |          |
| <b>Europe</b>                |               | 1  | 684    | 74.6 (56.0-95.5) | NA        | NA               | NA               | NA       | NA     |          |
| <b>South-East Asia</b>       |               | 4  | 26547  | 7.0 (4.8-9.5)    | 0.5-20.4  | 73.7 (26.4-90.6) | 1.9 (1.2-3.3)    | 0.0096   | 0.606  |          |
| <b>Western Pacific</b>       |               | 12 | 90972  | 27.2 (6.5-4.5)   | 0.1-95.4  | 99.0 (98.8-99.2) | 10.2 (9.2-11.3)  | < 0.0001 | 0.647  |          |
| <b>Africa</b>                | <b>WHO</b>    | 6  | 17544  | 9.1 (3.3-17.6)   | 0.0-52.9  | 95.8 (93.1-97.5) | 4.9 (3.8-6.3)    | < 0.0001 | 0.299  | < 0.0001 |
| <b>The Americas</b>          |               | 3  | 4662   | 29.3 (12.9-52.0) | 0.0-603.4 | 91.3 (77.4-96.6) | 3.4 (2.1-5.4)    | < 0.0001 | 0.322  |          |
| <b>Eastern Mediterranean</b> |               | 5  | 273419 | 5.8 (1.2-13.8)   | 0.0-56.0  | 99.7 (99.6-99.8) | 18.2 (16.2-20.4) | < 0.0001 | 0.146  |          |
| <b>Europe</b>                |               | 1  | 5440   | 5.1 (3.4-7.2)    | NA        | NA               | NA               | NA       | NA     |          |
| <b>South-East Asia</b>       |               | 9  | 62197  | 6.2 (2.3-12.0)   | 0.0-37.0  | 98.0 (97.3-98.5) | 7.0 (6.1-8.2)    | < 0.0001 | 0.094  |          |
| <b>Western Pacific</b>       |               | 5  | 14741  | 28.7 (15.4-46.0) | 0.0-117.1 | 96.7 (94.4-98.0) | 5.5 (4.2-7.1)    | < 0.0001 | 0.612  |          |
| <b>Africa</b>                | <b>A&gt;E</b> | 4  | 15196  | 7.2 (0.9-20.0)   | 0.0-112.2 | 97.0 (94.7-98.3) | 5.8 (4.3-7.7)    | < 0.0001 | 0.944  | < 0.0001 |
| <b>The Americas</b>          |               | 1  | 5996   | 41.9 (36.9-47.1) | NA        | NA               | NA               | NA       | NA     |          |
| <b>Eastern Mediterranean</b> |               | 8  | 269417 | 7.5 (1.6-17.4)   | 0.0-64.4  | 99.7 (99.7-99.8) | 19.3 (17.8-21.1) | < 0.0001 | 0.084  |          |
| <b>Europe</b>                |               | 1  | 6035   | 1.2 (0.4-2.2)    | NA        | NA               | NA               | NA       | NA     |          |
| <b>South-East Asia</b>       |               | 14 | 465296 | 2.9 (1.4-4.9)    | 0.0-14.4  | 98.7 (98.4-98.9) | 8.7 (7.9-9.6)    | < 0.0001 | 0.128  |          |
| <b>Western Pacific</b>       |               | 3  | 11933  | 21.0 (7.2-41.8)  | 0.0-632.6 | 97.8 (95.7-98.8) | 6.7 (4.8-9.2)    | < 0.0001 | 0.219  |          |
| <b>Africa</b>                | <b>E&gt;E</b> | 16 | 36250  | 24.4 (15.8-34.6) | 0.3-82.2  | 97.0 (96.1-97.7) | 5.7 (5.0-6.5)    | < 0.0001 | 0.411  | < 0.0001 |
| <b>The Americas</b>          |               | 5  | 9186   | 16.4 (2.9-39.8)  | 0.0-160.0 | 97.7 (96.3-98.5) | 6.6 (5.2-8.3)    | < 0.0001 | 0.921  |          |

|                              |               |    |        |                  |           |                  |                  |          |          |       |
|------------------------------|---------------|----|--------|------------------|-----------|------------------|------------------|----------|----------|-------|
| <b>Eastern Mediterranean</b> |               | 1  | 48930  | 2.9 (2.4-3.4)    | NA        | NA               | NA               | NA       | NA       |       |
| <b>Europe</b>                |               | 1  | 684    | 74.6 (56.0-95.5) | NA        | NA               | NA               | NA       | NA       |       |
| <b>South-East Asia</b>       |               | 8  | 98779  | 9.2 (3.5-17.4)   | 0.0-52.3  | 99.0 (98.6-99.2) | 9.8 (8.5-11.2)   | < 0.0001 | 0.024    |       |
| <b>Western Pacific</b>       |               | 15 | 103080 | 27.2 (16.2-40.9) | 0.0-105.9 | 99.2 (99.1-99.4) | 11.5 (10.5-12.5) | < 0.0001 | 0.895    |       |
| Areas                        |               |    |        |                  |           |                  |                  |          |          |       |
| <b>Rural</b>                 | <b>WHF</b>    | 4  | 9653   | 31.1 (20.8-43.5) | 0.4-105.1 | 89.8 (76.8-95.5) | 3.1 (2.1-4.7)    | < 0.0001 | 0.148    | 0.090 |
| <b>Urban</b>                 |               | 10 | 34466  | 15.6 (8.4-24.9)  | 0.0-61.7  | 96.9 (95.6-97.8) | 5.7 (4.8-6.7)    | < 0.0001 | 0.616    |       |
| <b>Both</b>                  |               | 13 | 82909  | 24.3 (13.2-38.5) | 0.0-102.7 | 99.1 (98.9-99.3) | 10.6 (9.6-11.7)  | < 0.0001 | 0.467    |       |
| <b>Rural</b>                 | <b>WHO</b>    | 3  | 12269  | 8.3 (1.2-21.5)   | 0.0-518.2 | 97.8 (96.4-98.7) | 6.8 (5.2-8.8)    | < 0.0001 | 0.509    | 0.415 |
| <b>Urban</b>                 |               | 15 | 259373 | 11.8 (6.1-19.4)  | 0.0-57.4  | 99.3 (99.2-99.4) | 11.9 (11.0-13.0) | < 0.0001 | 0.0005   |       |
| <b>Both</b>                  |               | 8  | 49948  | 16.0 (5.0-33.1)  | 0.0-107.6 | 99.3 (99.1-99.4) | 11.9 (10.6-13.4) | < 0.0001 | 0.131    |       |
| <b>Rural</b>                 | <b>A&gt;E</b> | 6  | 291357 | 4.5 (0.9-10.9)   | 0.0-41.6  | 99.2 (99.0-99.4) | 11.3 (10.0-12.8) | < 0.0001 | 0.266    | 0.635 |
| <b>Urban</b>                 |               | 18 | 312681 | 8.1 (3.6-14.3)   | 0.0-51.4  | 99.5 (99.4-99.6) | 14.2 (13.2-15.2) | < 0.0001 | 0.008    |       |
| <b>Both</b>                  |               | 5  | 49780  | 5.6 (0.1-18.8)   | 0.0-100.2 | 99.5 (99.3-99.6) | 13.8 (12.0-15.9) | < 0.0001 | 0.349    |       |
| <b>Rural</b>                 | <b>E&gt;E</b> | 6  | 24360  | 14.5 (5.5-27.7)  | 0.0-83.3  | 98.1 (97.2-98.7) | 7.2 (6.0-8.8)    | < 0.0001 | 0.415    | 0.741 |
| <b>Urban</b>                 |               | 14 | 53138  | 17.5 (12.4-23.6) | 1.9-47.8  | 95.2 (93.3-96.5) | 4.5 (3.9-5.4)    | < 0.0001 | 0.018    |       |
| <b>Both</b>                  |               | 21 | 16224  | 20.6 (10.8-23.6) | 0.0-112.3 | 99.5 (99.5-99.6) | 14.9 (14.0-15.8) | < 0.0001 | 0.265    |       |
| Settings                     |               |    |        |                  |           |                  |                  |          |          |       |
| <b>Community-based</b>       | <b>WHF</b>    | 7  | 44190  | 30.7 (19.8-44.0) | 2.6-5.3   | 94.2 (90.4-96.5) | 4.1 (3.2-5.3)    | < 0.0001 | 0.096    | 0.302 |
| <b>School-based</b>          |               | 24 | 103079 | 24.6 (17.5-32.8) | 0.7-79.4  | 98.3 (98.0-98.6) | 7.8 (7.1-8.5)    | < 0.0001 | 0.037    |       |
| <b>Both</b>                  |               | 1  | 1450   | 33.8 (25.1-43.7) | NA        | NA               | NA               | NA       | NA       |       |
| <b>Community-based</b>       | <b>WHO</b>    | 1  | 489    | 22.5 (11.0-37.8) | NA        | NA               | NA               | NA       | NA       | 0.06  |
| <b>School-based</b>          |               | 28 | 377514 | 11.0 (7.0-16.0)  | 0.0-49.6  | 99.3 (99.2-99.3) | 11.6 (10.9-12.3) | < 0.0001 | < 0.0001 |       |
| <b>Both</b>                  |               | 0  | NA     | NA               | NA        | NA               | NA               | NA       | NA       |       |
| <b>Community-based</b>       | <b>A&gt;E</b> | 4  | 62666  | 6.0 (3.2-9.7)    | 0.0-30.6  | 94.0 (87.9-97.1) | 4.1 (2.9-5.8)    | < 0.0001 | 0.216    | 0.732 |
| <b>School-based</b>          |               | 26 | 593195 | 6.8 (3.9-10.4)   | 0.0-32.2  | 99.4 (99.3-99.5) | 13.0 (12.2-13.7) | < 0.0001 | 0.002    |       |
| <b>Both</b>                  |               | 0  | NA     | NA               | NA        | NA               | NA               | NA       | NA       |       |
| <b>Community-based</b>       | <b>E&gt;E</b> | 8  | 54439  | 19.1 (4.7-42.5)  | 0.0-146.6 | 99.3 (99.2-99.5) | 12.2 (10.9-13.8) | < 0.0001 | 0.276    | 0.846 |
| <b>School-based</b>          |               | 36 | 235097 | 22.2 (16.3-29.1) | 0.0-79.0  | 99.0 (98.9-99.1) | 10.1 (9.5-10.7)  | < 0.0001 | < 0.0001 |       |
| <b>Both</b>                  |               | 2  | 7373   | 12.1 (0.0-64.1)  | NA        | 99.0 (98.1-99.5) | 10.1             | < 0.0001 | NA       |       |

NA: not applicable; WHF: World Heart Federation; WHO: World Heart Organization; UNSD: United Nations Statistical Divisions; A>E = Auscultation only for screening followed with echography confirmation; E>E: Echography +/- auscultation for screening followed with echography for confirmation; NA = not applicable

**Supplementary Figure 1. Funnel plot for publication bias for studies using the WHO diagnostic criteria**

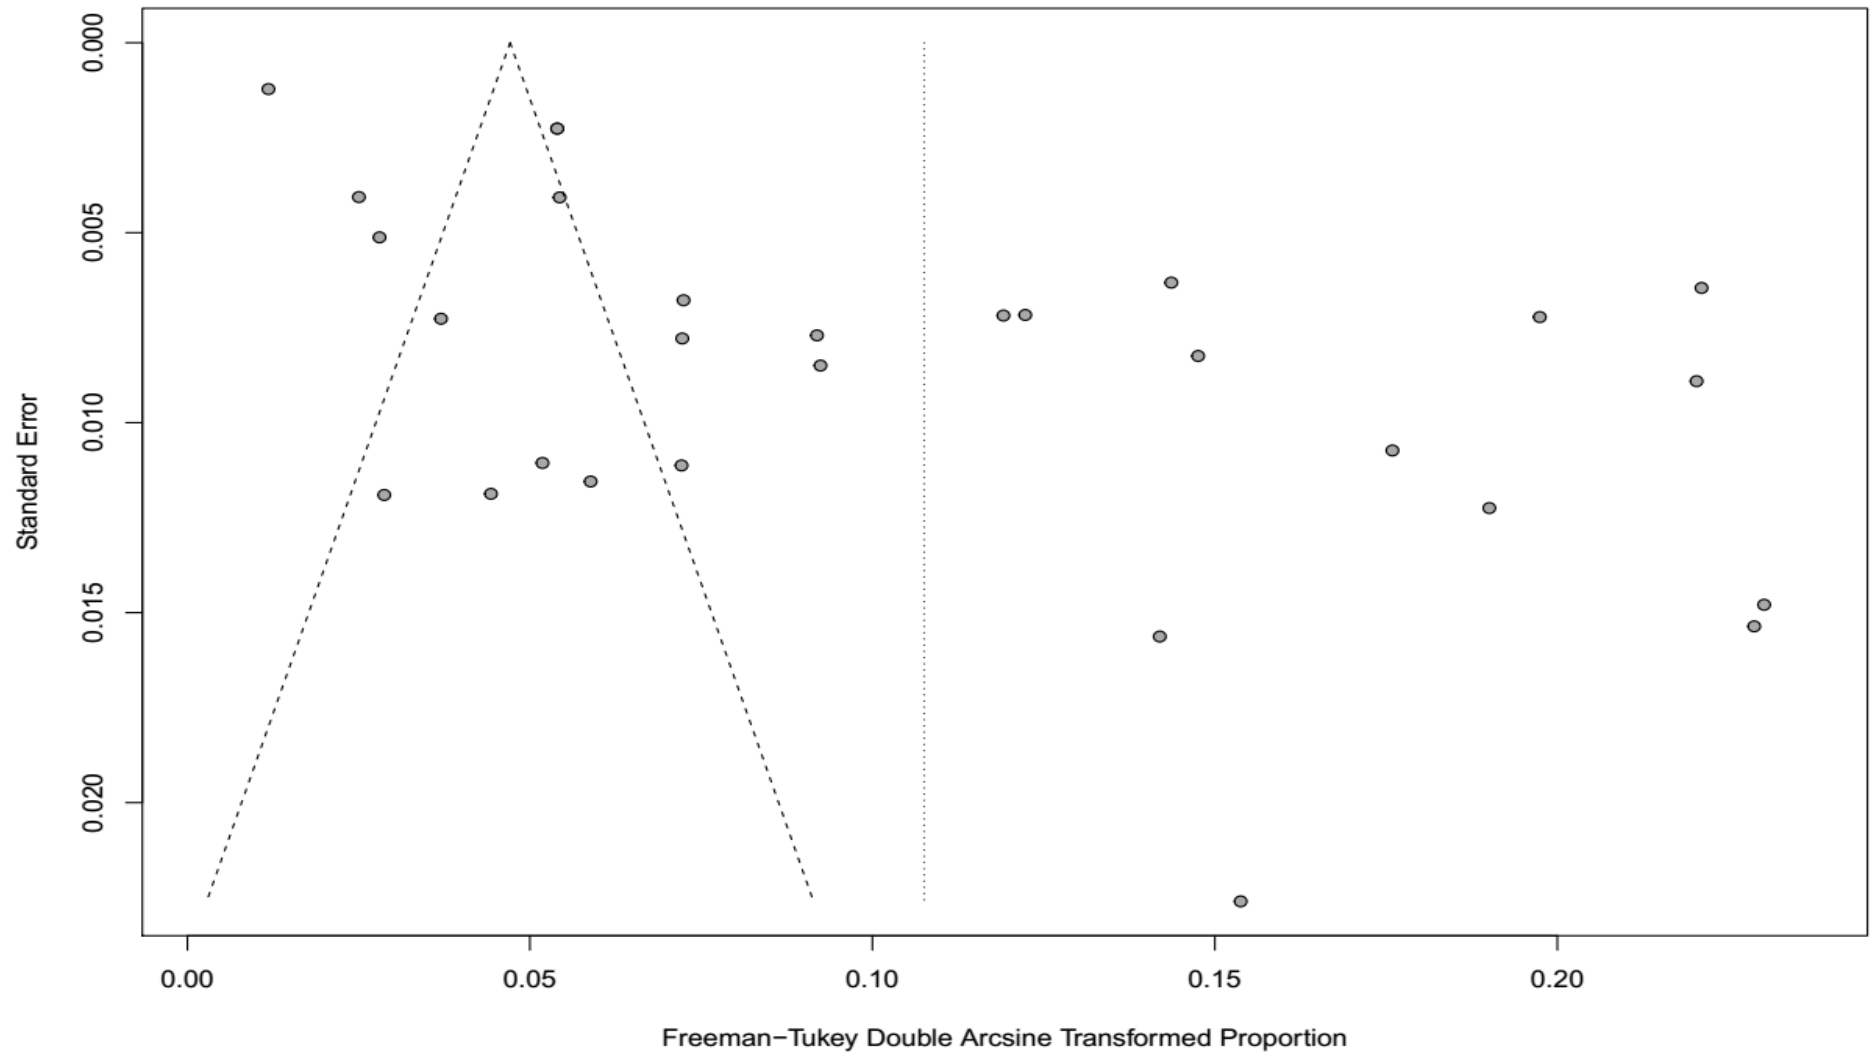

Supplementary Figure 2. Funnel plot for publication bias for studies using the WHF diagnostic criteria

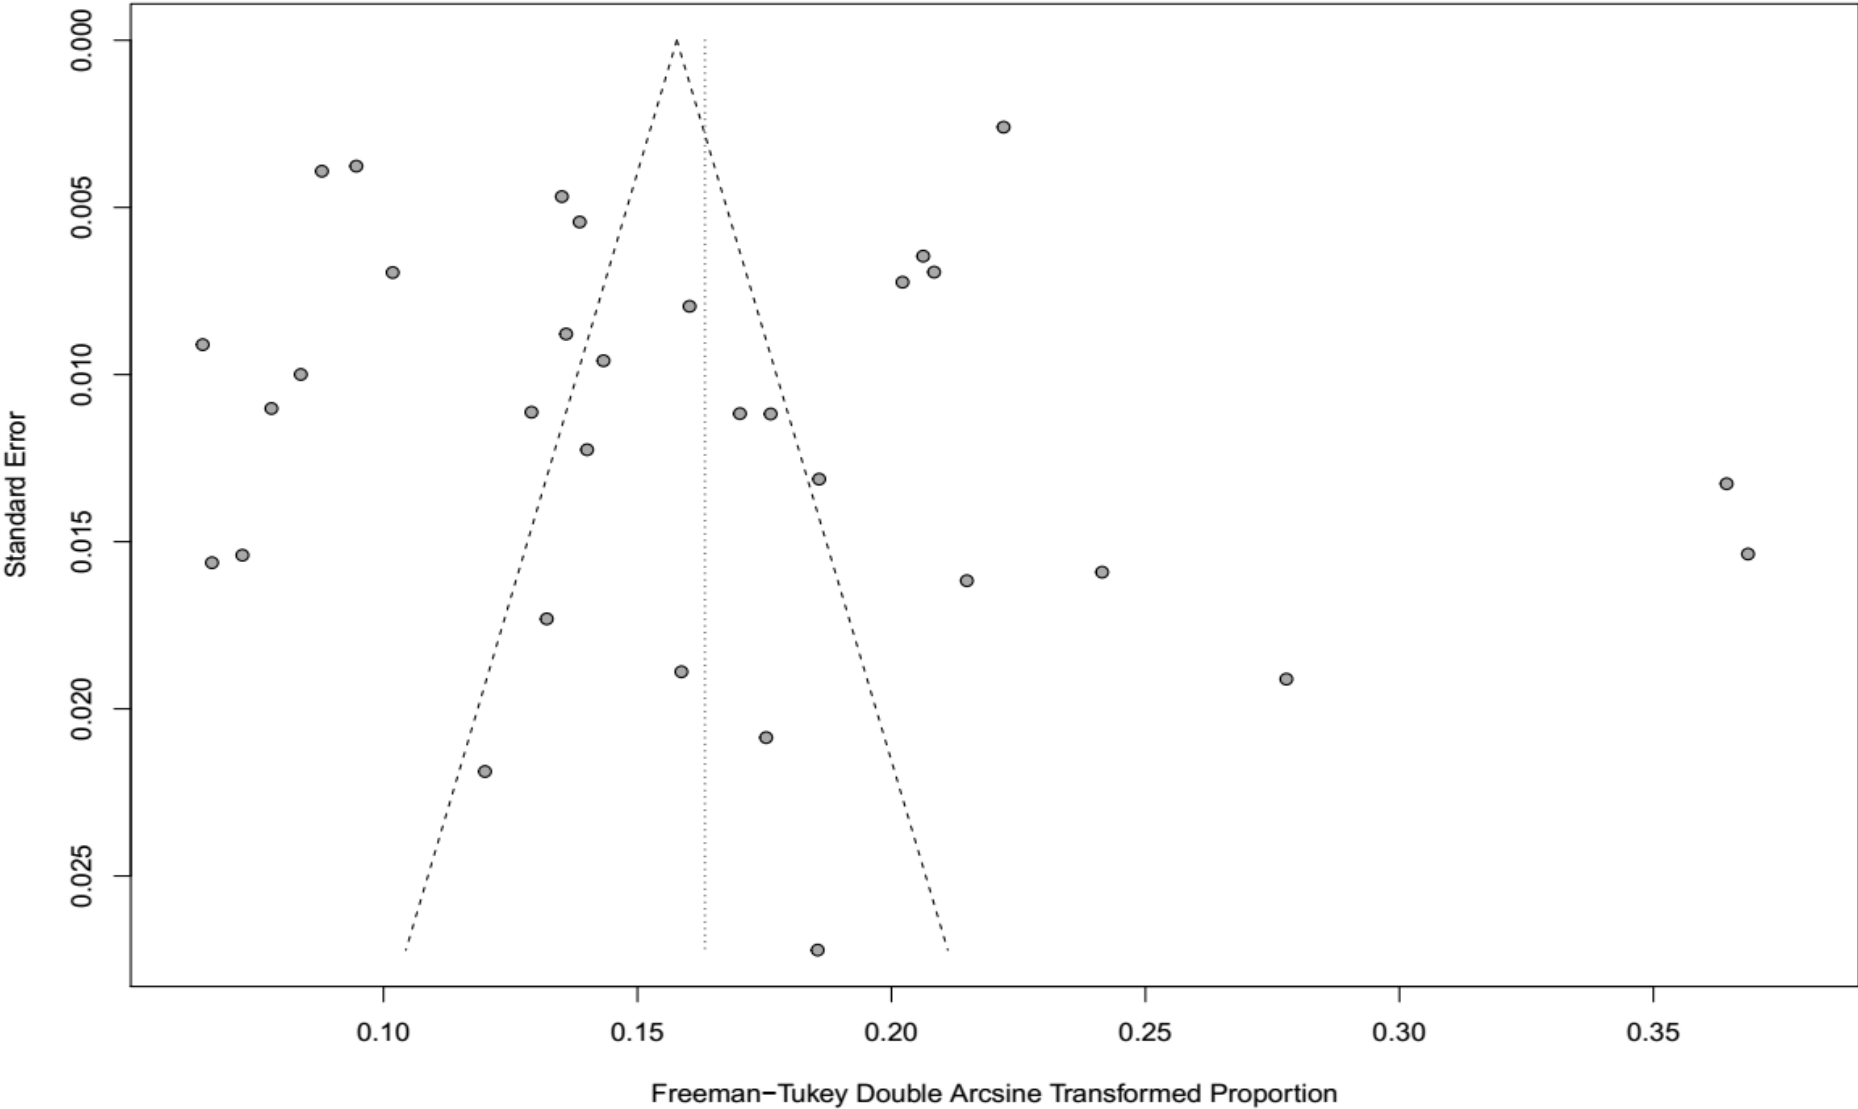

**Supplementary Figure 3. Funnel plot for publication bias for studies using diagnostic criteria other than WHF and WHO**

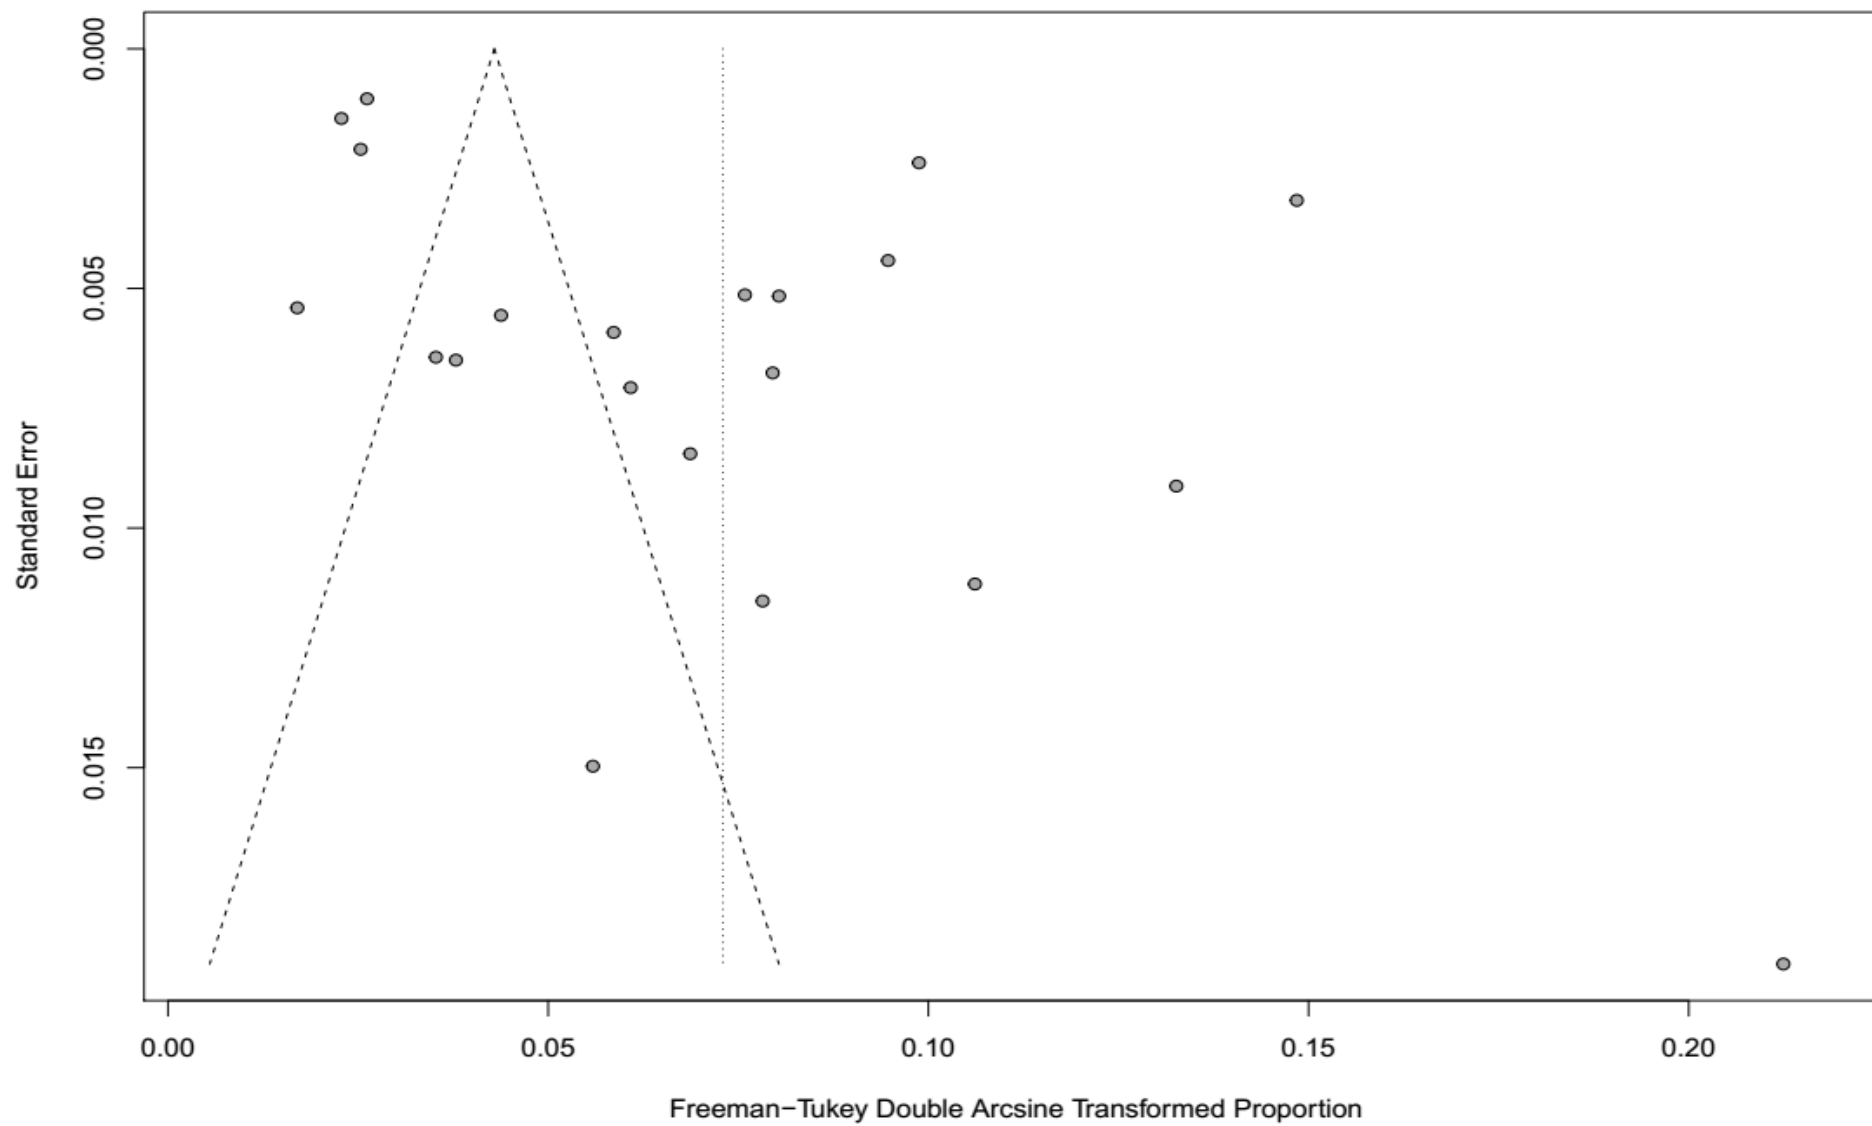

**Supplementary Figure 4. Funnel plot for publication bias for studies using an auscultation-echocardiographic screening protocol**

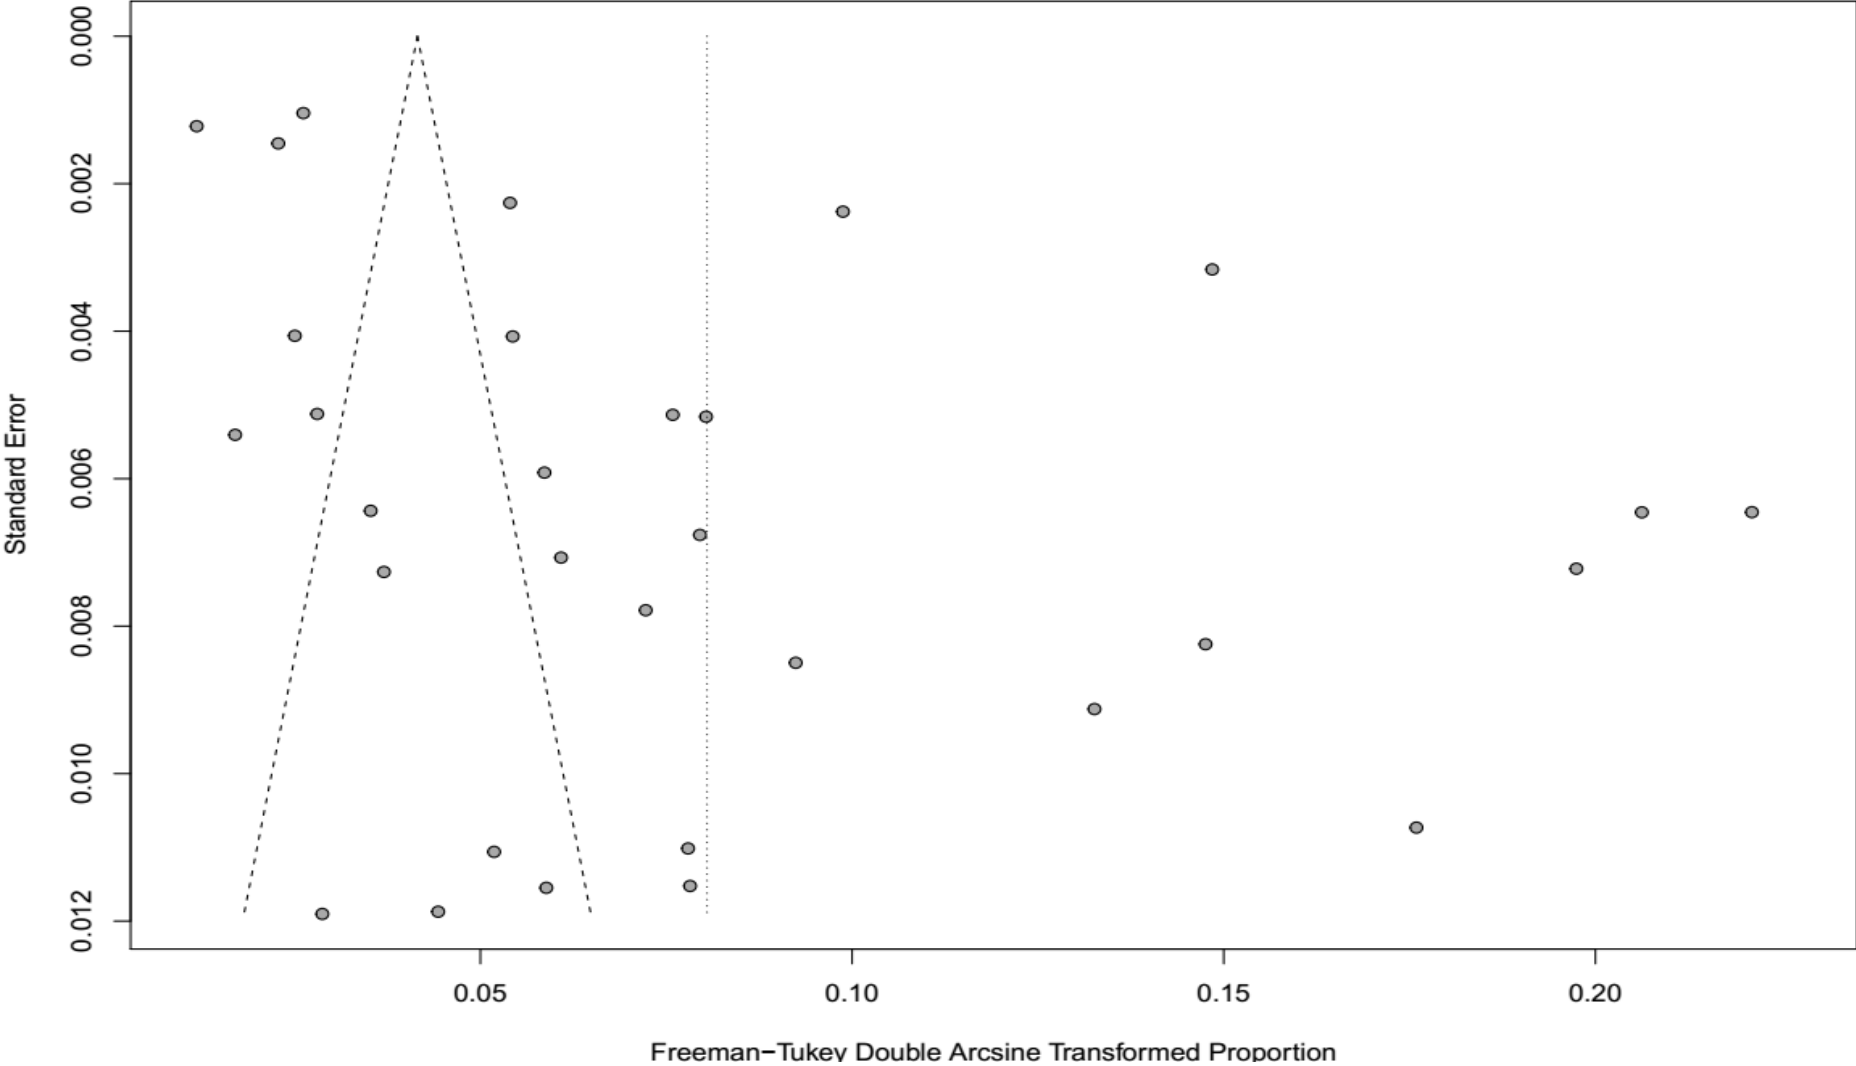



**Supplementary Figure 5. Funnel plot for publication bias for studies using an echocardiography-echocardiography screening protocol**

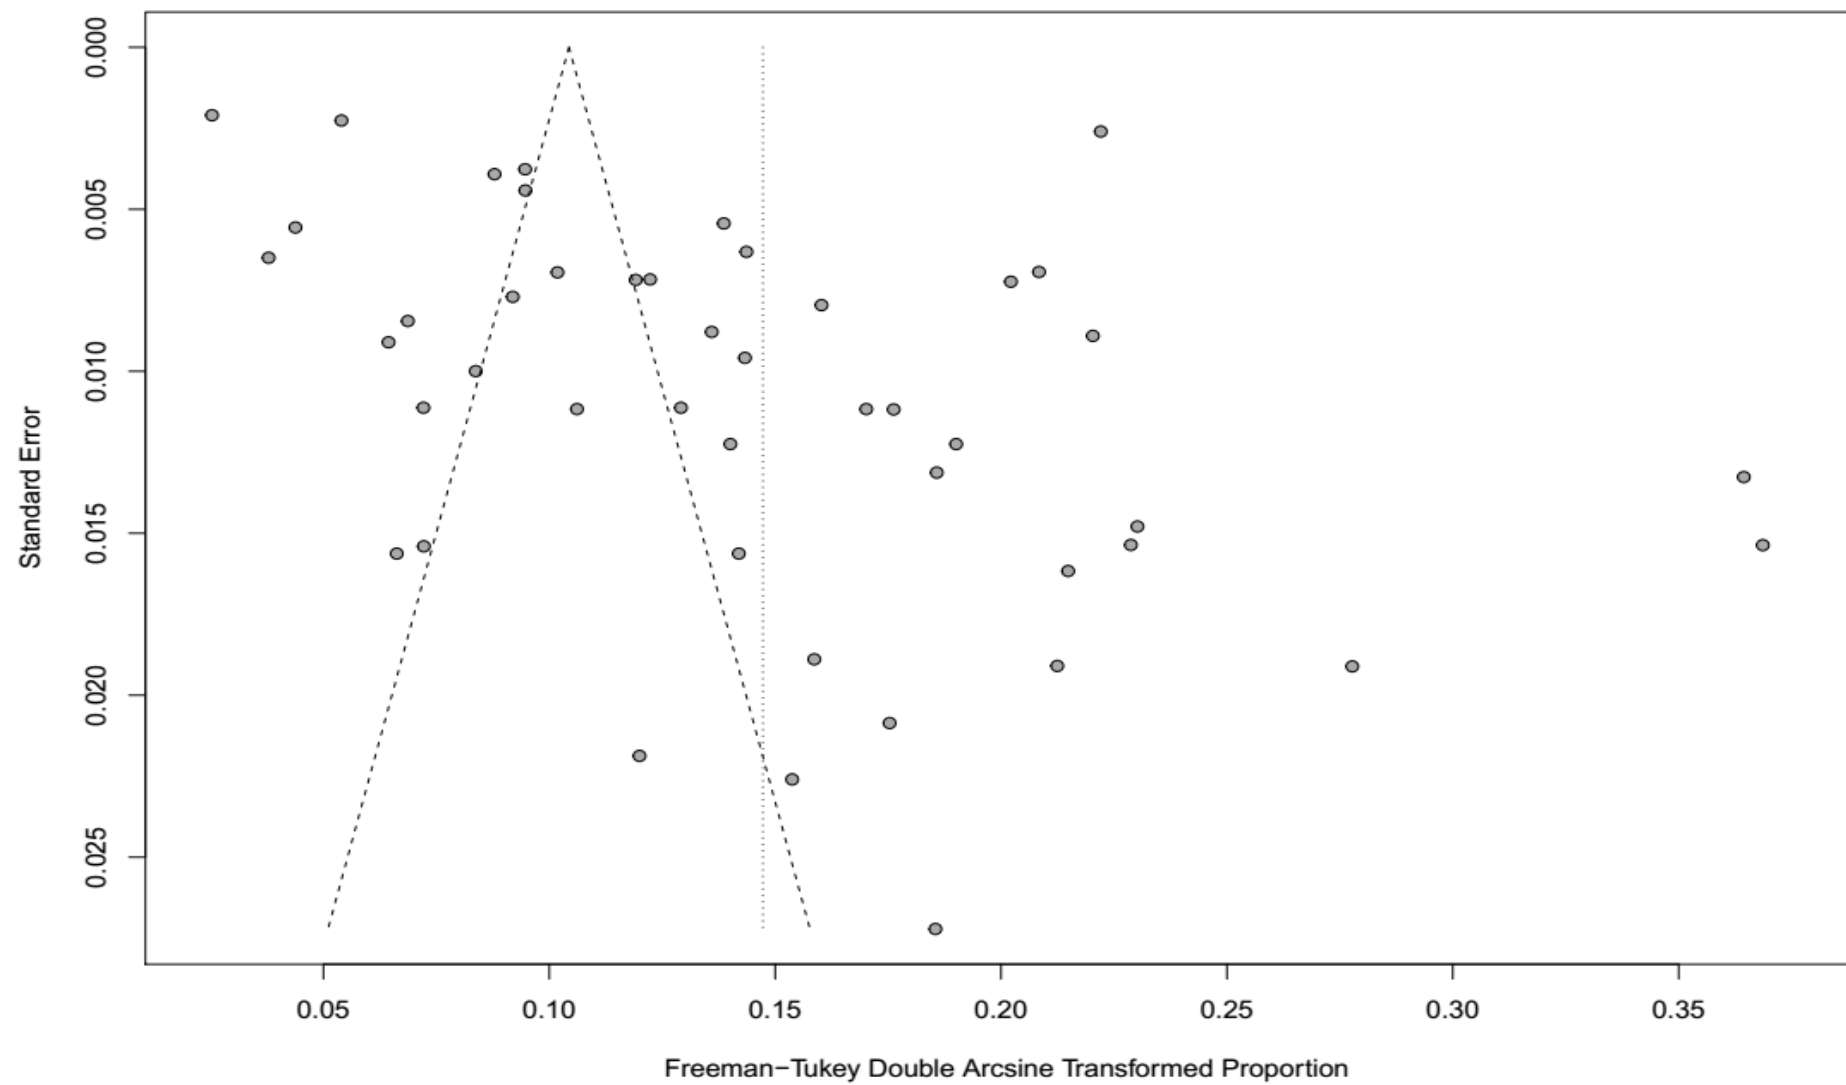

**Supplementary Figure 6. Funnel plot for publication bias for studies using only one step echocardiography screening protocol**

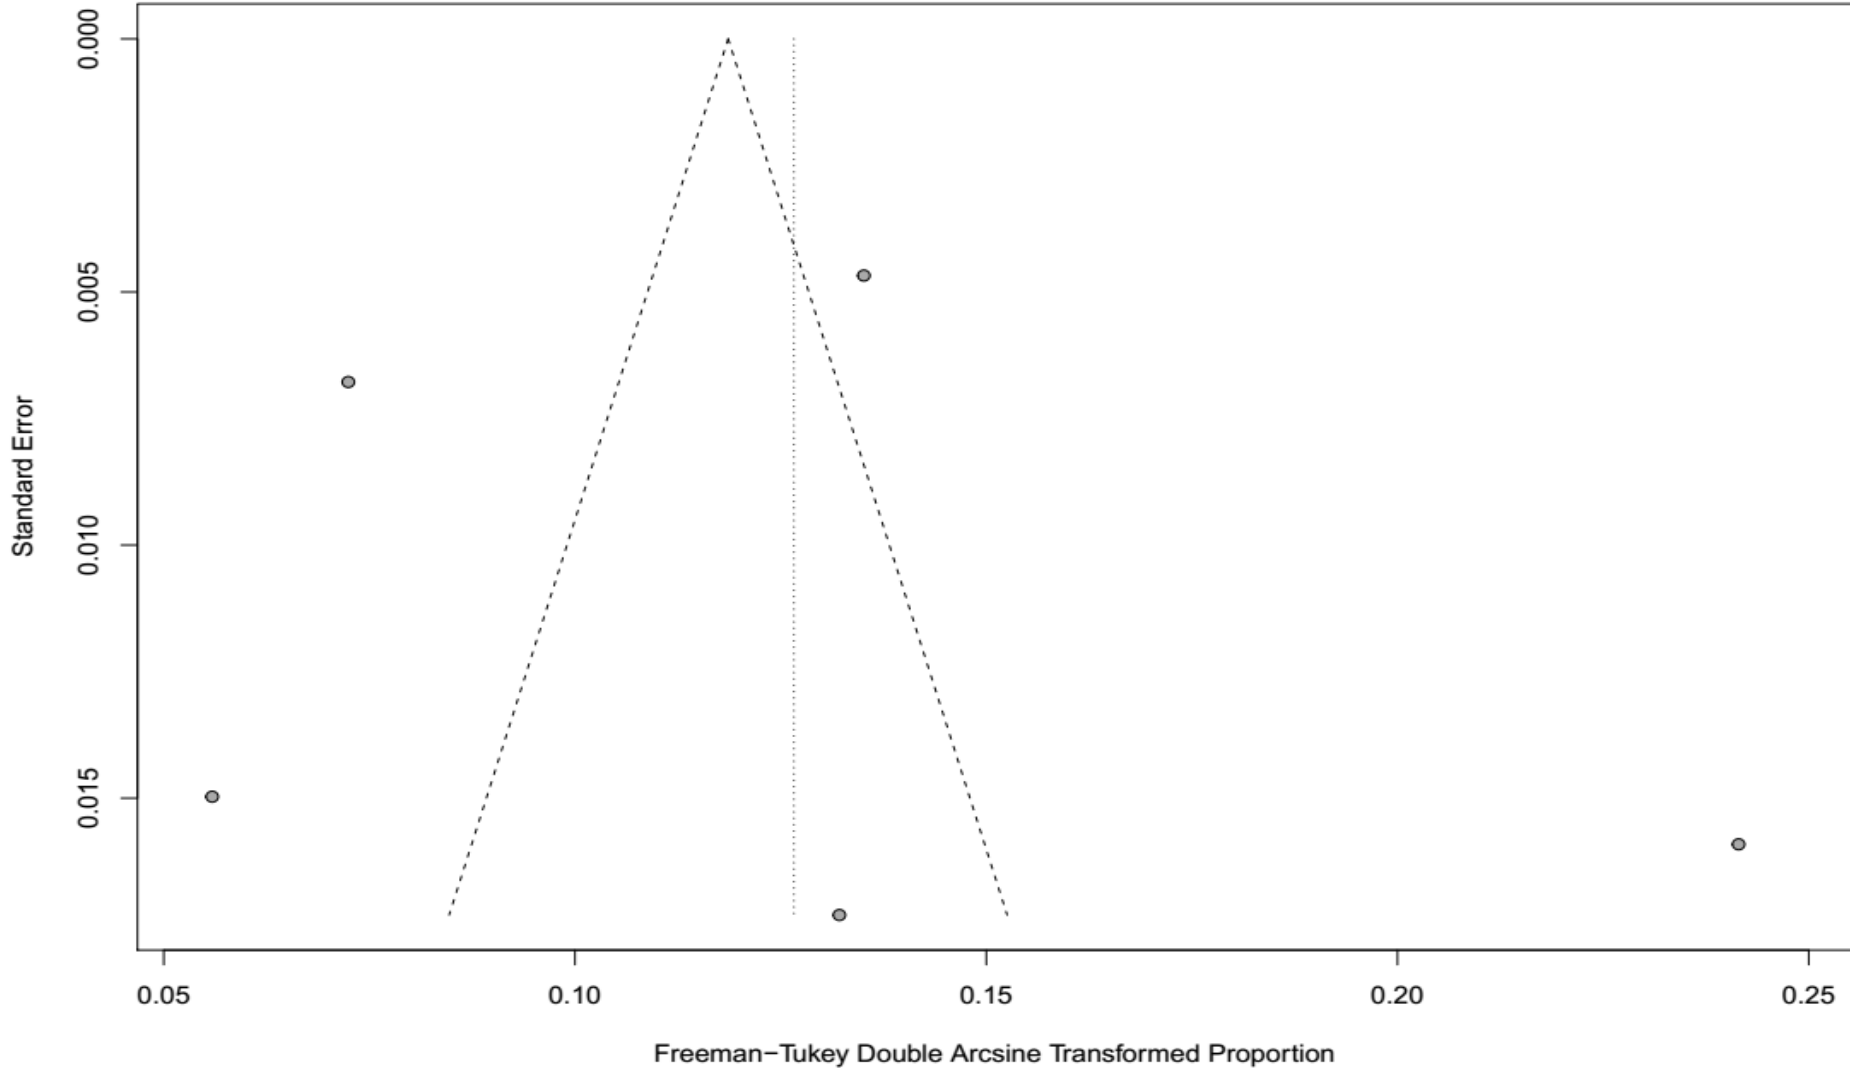

Supplement: 41598_2019_53540_MOESM1_ESM.pdf [file 41598_2019_53540_MOESM1_ESM.pdf]
